# Supplementary material
Source: Research Square preprint supplement (doi:10.21203/rs.3.rs-9217016/v1)
Supplement: Supplementary file 1 [file 47967477b2d53e96bd912e97.xlsx]

## Sheet: Title
Supplementary Information (including Supplementary Tables 1–4)
Language-dependent variability in large language model performance on pharmaceutical knowledge tasks
Hiroto Asano1, Yu-Shi Tian1*, Asuka Hatabu1, Minako Ohishi1, Kaori Fukuzawa1, Daisuke Takaya1, Kenji Ikeda1
1Graduate School of Pharmaceutical Sciences, The University of Osaka, 1-6 Yamadaoka, Suita, Osaka 565-0871, Japan
* Corresponding author:
Yu-Shi Tian
Graduate School of Pharmaceutical Sciences, The University of Osaka
1-6 Yamadaoka, Suita City, Osaka 565-0871, Japan
Phone No: +81-6-6879-8242
Fax No: +81-6-6879-8242
Email Address: yushi-tian@phs.osaka-u.ac.jp

## Sheet: Table S1
Table S1. Overall model performance across all benchmarks
Model	Mean accuracy (%)	SD (trial)
gemini-3-flash-preview	93.0703	0.268088
qwen3.5:397b	86.7471	0.539801
glm-5	86.4745	0.289328
glm-4.7	85.9771	0.108166
deepseek-v3.2	85.3434	0.227627
glm-4.6	84.9755	0.18735
qwen3-vl:235b	83.3742	0.129821
kimi-k2-thinking	83.1698	0.204756
minimax-m2.5	82.5497	0.519687
qwen3-next:80b	81.9978	0.139143
kimi-k2.5	81.8138	0.388568
mistral-large-3:675b	80.2194	0.031225
minimax-m2.1	80.0831	0.0624499
gpt-oss:120b	78.4069	0.198539
minimax-m2	78.4001	0.379868
qwen3-vl:235b-instruct	77.6301	0.0590096
devstral-2:123b	75.8926	0.131421
kimi-k2:1t	74.816	0.0891026
gpt-oss:20b	71.5318	0.165227
cogito-2.1:671b	70.9866	0.444261
qwen3-coder-next	68.0499	0.347506
qwen3-coder:480b	67.7637	0.124341
deepseek-v3.1:671b	66.9665	0.317338
ministral-3:14b	64.0365	0.104898
nemotron-3-super	62.7351	0.523958
devstral-small-2:24b	61.0589	0.143091
gemma3:27b	56.6026	0.102208
ministral-3:8b	54.6947	0.204756
gemma3:12b	47.8468	0.102887
ministral-3:3b	38.3551	0.324714
nemotron-3-nano:30b	33.1017	0.749492
gemma3:4b	28.9043	0.195
rnj-1:8b	23.5691	0.224857

## Sheet: Table S2
Table S2. Model performance by examination year
Examination	Model	Mean accuracy (%)	SD (trial)
JNEP-EN 2020	gemini-3-flash-preview	82.5871	1.31629
JNEP-EN 2020	kimi-k2.5	79.4362	1.14896
JNEP-EN 2020	qwen3.5:397b	78.9386	0.759963
JNEP-EN 2020	glm-5	77.6119	0.995025
JNEP-EN 2020	qwen3-vl:235b	76.6169	1.79381
JNEP-EN 2020	glm-4.7	75.7877	0.287239
JNEP-EN 2020	kimi-k2-thinking	74.7927	2.55304
JNEP-EN 2020	qwen3-next:80b	74.461	1.14896
JNEP-EN 2020	glm-4.6	74.2952	1.51993
JNEP-EN 2020	deepseek-v3.2	74.1294	1.31629
JNEP-EN 2020	minimax-m2.5	73.3002	1.25205
JNEP-EN 2020	minimax-m2	72.8027	2.35115
JNEP-EN 2020	minimax-m2.1	71.9735	1.14896
JNEP-EN 2020	qwen3-vl:235b-instruct	70.6468	0.497512
JNEP-EN 2020	gpt-oss:120b	69.8176	2.07131
JNEP-EN 2020	kimi-k2:1t	67.33	1.59928
JNEP-EN 2020	gpt-oss:20b	66.5008	2.50409
JNEP-EN 2020	devstral-2:123b	62.3549	0.759963
JNEP-EN 2020	mistral-large-3:675b	61.6915	0.497512
JNEP-EN 2020	qwen3-coder-next	59.0381	1.43619
JNEP-EN 2020	qwen3-coder:480b	58.0431	0.574478
JNEP-EN 2020	cogito-2.1:671b	57.5456	0.759963
JNEP-EN 2020	deepseek-v3.1:671b	55.2239	2.63259
JNEP-EN 2020	nemotron-3-super	54.8922	3.79981
JNEP-EN 2020	ministral-3:14b	54.2289	0.497512
JNEP-EN 2020	devstral-small-2:24b	52.5705	0.287239
JNEP-EN 2020	gemma3:27b	51.2438	0.497512
JNEP-EN 2020	ministral-3:8b	46.6003	0.759963
JNEP-EN 2020	gemma3:12b	43.4494	0.759963
JNEP-EN 2020	nemotron-3-nano:30b	40.4643	2.82898
JNEP-EN 2020	ministral-3:3b	39.9668	0.759963
JNEP-EN 2020	gemma3:4b	31.3433	0.497512
JNEP-EN 2020	rnj-1:8b	26.8657	4.42199
JNEP-EN 2021	gemini-3-flash-preview	84.434	0.817005
JNEP-EN 2021	glm-5	79.2453	0
JNEP-EN 2021	kimi-k2.5	79.0881	1.96384
JNEP-EN 2021	qwen3.5:397b	77.8302	1.63401
JNEP-EN 2021	glm-4.7	77.673	0.720531
JNEP-EN 2021	qwen3-vl:235b	75.9434	2.35849
JNEP-EN 2021	deepseek-v3.2	75.4717	1.248
JNEP-EN 2021	glm-4.6	74.5283	3.86102
JNEP-EN 2021	kimi-k2-thinking	74.5283	1.248
JNEP-EN 2021	gpt-oss:120b	74.3711	0.272335
JNEP-EN 2021	qwen3-next:80b	73.1132	0.943396
JNEP-EN 2021	minimax-m2.5	72.7987	1.78582
JNEP-EN 2021	minimax-m2	70.1258	2.127
JNEP-EN 2021	minimax-m2.1	69.8113	2.05608
JNEP-EN 2021	qwen3-vl:235b-instruct	67.1384	0.272335
JNEP-EN 2021	kimi-k2:1t	66.8239	0.54467
JNEP-EN 2021	gpt-oss:20b	64.6226	2.6263
JNEP-EN 2021	mistral-large-3:675b	62.7358	0.471698
JNEP-EN 2021	devstral-2:123b	61.6352	1.08934
JNEP-EN 2021	qwen3-coder:480b	61.1635	1.18708
JNEP-EN 2021	cogito-2.1:671b	60.6918	1.78582
JNEP-EN 2021	qwen3-coder-next	60.2201	1.08934
JNEP-EN 2021	deepseek-v3.1:671b	58.3333	0.272335
JNEP-EN 2021	nemotron-3-super	57.0755	2.94575
JNEP-EN 2021	ministral-3:14b	53.9308	1.18708
JNEP-EN 2021	devstral-small-2:24b	52.673	0.720531
JNEP-EN 2021	ministral-3:8b	46.6981	0.471698
JNEP-EN 2021	gemma3:27b	44.4969	0.272335
JNEP-EN 2021	gemma3:12b	43.7107	0.54467
JNEP-EN 2021	ministral-3:3b	41.3522	1.65655
JNEP-EN 2021	nemotron-3-nano:30b	38.3648	1.96384
JNEP-EN 2021	gemma3:4b	35.8491	0.471698
JNEP-EN 2021	rnj-1:8b	26.8868	3.40146
JNEP-EN 2022	gemini-3-flash-preview	85.873	1.19839
JNEP-EN 2022	glm-5	79.6825	1.53074
JNEP-EN 2022	kimi-k2.5	79.0476	2.07567
JNEP-EN 2022	qwen3.5:397b	77.9365	5.8773
JNEP-EN 2022	glm-4.7	76.6667	2.18218
JNEP-EN 2022	deepseek-v3.2	75.873	0.727393
JNEP-EN 2022	glm-4.6	74.9206	0.549857
JNEP-EN 2022	kimi-k2-thinking	74.7619	0.824786
JNEP-EN 2022	qwen3-vl:235b	73.9683	1.67233
JNEP-EN 2022	qwen3-next:80b	73.8095	1.64957
JNEP-EN 2022	minimax-m2.5	72.381	0.47619
JNEP-EN 2022	kimi-k2:1t	70.7937	1.67233
JNEP-EN 2022	minimax-m2	70.7937	0.727393
JNEP-EN 2022	gpt-oss:120b	70.6349	1.53074
JNEP-EN 2022	minimax-m2.1	70.6349	1.19839
JNEP-EN 2022	qwen3-vl:235b-instruct	69.6825	0.549857
JNEP-EN 2022	gpt-oss:20b	69.5238	2.89655
JNEP-EN 2022	mistral-large-3:675b	63.6508	0.549857
JNEP-EN 2022	cogito-2.1:671b	63.1746	1.80283
JNEP-EN 2022	devstral-2:123b	63.1746	0.727393
JNEP-EN 2022	qwen3-coder-next	61.4286	1.25988
JNEP-EN 2022	deepseek-v3.1:671b	60.1587	1.19839
JNEP-EN 2022	qwen3-coder:480b	57.4603	1.09971
JNEP-EN 2022	ministral-3:14b	57.3016	0.274929
JNEP-EN 2022	nemotron-3-super	56.6667	2.18218
JNEP-EN 2022	devstral-small-2:24b	55.2381	0.824786
JNEP-EN 2022	gemma3:27b	52.0635	0.274929
JNEP-EN 2022	ministral-3:8b	51.746	1.09971
JNEP-EN 2022	gemma3:12b	48.7302	0.274929
JNEP-EN 2022	ministral-3:3b	46.1905	1.25988
JNEP-EN 2022	nemotron-3-nano:30b	40.4762	2.18218
JNEP-EN 2022	gemma3:4b	30	0.47619
JNEP-EN 2022	rnj-1:8b	29.2063	1.19839
JNEP-EN 2023	gemini-3-flash-preview	83.0033	1.87423
JNEP-EN 2023	glm-5	79.3729	2.81497
JNEP-EN 2023	qwen3.5:397b	79.3729	1.59136
JNEP-EN 2023	kimi-k2.5	77.0627	1.03053
JNEP-EN 2023	glm-4.7	76.8977	0.285817
JNEP-EN 2023	deepseek-v3.2	75.7426	0
JNEP-EN 2023	kimi-k2-thinking	75.5776	1.87423
JNEP-EN 2023	minimax-m2.5	74.5875	0.756201
JNEP-EN 2023	qwen3-vl:235b	74.0924	1.03053
JNEP-EN 2023	glm-4.6	73.7624	0.990099
JNEP-EN 2023	qwen3-next:80b	73.2673	0.990099
JNEP-EN 2023	minimax-m2.1	73.1023	2.33951
JNEP-EN 2023	gpt-oss:120b	72.4422	0.756201
JNEP-EN 2023	minimax-m2	69.4719	2.06106
JNEP-EN 2023	kimi-k2:1t	69.3069	0.990099
JNEP-EN 2023	gpt-oss:20b	67.4917	0.756201
JNEP-EN 2023	qwen3-vl:235b-instruct	67.4917	0.285817
JNEP-EN 2023	mistral-large-3:675b	66.5017	0.571634
JNEP-EN 2023	devstral-2:123b	61.7162	0.571634
JNEP-EN 2023	qwen3-coder:480b	60.231	1.24585
JNEP-EN 2023	ministral-3:14b	60.066	0.756201
JNEP-EN 2023	cogito-2.1:671b	59.571	0.756201
JNEP-EN 2023	nemotron-3-super	58.7459	1.03053
JNEP-EN 2023	qwen3-coder-next	58.7459	1.14327
JNEP-EN 2023	deepseek-v3.1:671b	58.2508	2.06106
JNEP-EN 2023	devstral-small-2:24b	56.9307	0.49505
JNEP-EN 2023	gemma3:27b	53.3003	0.756201
JNEP-EN 2023	ministral-3:8b	52.4752	0.49505
JNEP-EN 2023	gemma3:12b	43.8944	0.756201
JNEP-EN 2023	ministral-3:3b	42.7393	1.14327
JNEP-EN 2023	nemotron-3-nano:30b	40.9241	1.24585
JNEP-EN 2023	rnj-1:8b	30.6931	3.24626
JNEP-EN 2023	gemma3:4b	28.8779	1.24585
JNEP-EN 2024	gemini-3-flash-preview	79.8485	1.14391
JNEP-EN 2024	glm-5	73.1818	3.18182
JNEP-EN 2024	qwen3.5:397b	72.8788	0.946212
JNEP-EN 2024	kimi-k2.5	72.7273	2.40523
JNEP-EN 2024	glm-4.7	71.3636	0.454545
JNEP-EN 2024	deepseek-v3.2	70.1515	0.69433
JNEP-EN 2024	kimi-k2-thinking	69.2424	1.31216
JNEP-EN 2024	glm-4.6	69.0909	0.787296
JNEP-EN 2024	minimax-m2.5	68.9394	1.72088
JNEP-EN 2024	qwen3-vl:235b	68.1818	1.20261
JNEP-EN 2024	qwen3-next:80b	67.1212	1.04973
JNEP-EN 2024	minimax-m2	64.697	1.59631
JNEP-EN 2024	minimax-m2.1	64.697	2.50344
JNEP-EN 2024	mistral-large-3:675b	63.6364	0.454545
JNEP-EN 2024	gpt-oss:120b	63.1818	0.909091
JNEP-EN 2024	qwen3-vl:235b-instruct	63.1818	0.454545
JNEP-EN 2024	kimi-k2:1t	63.0303	0.262432
JNEP-EN 2024	cogito-2.1:671b	60.9091	1.57459
JNEP-EN 2024	devstral-2:123b	60.6061	0.69433
JNEP-EN 2024	qwen3-coder-next	58.0303	1.46116
JNEP-EN 2024	gpt-oss:20b	57.5758	0.69433
JNEP-EN 2024	qwen3-coder:480b	57.4242	0.524864
JNEP-EN 2024	deepseek-v3.1:671b	56.0606	3.64582
JNEP-EN 2024	nemotron-3-super	52.8788	1.83702
JNEP-EN 2024	ministral-3:14b	51.3636	0.454545
JNEP-EN 2024	devstral-small-2:24b	49.8485	0.262432
JNEP-EN 2024	gemma3:27b	46.8182	0.454545
JNEP-EN 2024	gemma3:12b	45.9091	0.454545
JNEP-EN 2024	ministral-3:8b	44.0909	0.454545
JNEP-EN 2024	ministral-3:3b	43.4848	0.262432
JNEP-EN 2024	nemotron-3-nano:30b	35.1515	2.24222
JNEP-EN 2024	gemma3:4b	28.9394	0.262432
JNEP-EN 2024	rnj-1:8b	28.7879	2.58465
JNEP-JA 2012	gemini-3-flash-preview	98.5294	0.735294
JNEP-JA 2012	glm-5	93.9951	0.925225
JNEP-JA 2012	deepseek-v3.2	93.5049	0.56159
JNEP-JA 2012	glm-4.7	93.2598	1.06131
JNEP-JA 2012	qwen3.5:397b	92.8922	1.39189
JNEP-JA 2012	glm-4.6	92.2794	1.83824
JNEP-JA 2012	qwen3-vl:235b	91.6667	1.85045
JNEP-JA 2012	kimi-k2-thinking	91.4216	0.56159
JNEP-JA 2012	qwen3-next:80b	90.8088	0
JNEP-JA 2012	minimax-m2.1	89.8284	0.765318
JNEP-JA 2012	minimax-m2.5	89.7059	0.972703
JNEP-JA 2012	kimi-k2.5	88.7255	0.56159
JNEP-JA 2012	minimax-m2	87.2549	0.424522
JNEP-JA 2012	mistral-large-3:675b	86.8873	0.212261
JNEP-JA 2012	gpt-oss:120b	86.2745	1.18182
JNEP-JA 2012	qwen3-vl:235b-instruct	85.7843	0.849045
JNEP-JA 2012	devstral-2:123b	82.4755	0.424522
JNEP-JA 2012	kimi-k2:1t	81.9853	0
JNEP-JA 2012	gpt-oss:20b	79.6569	0.849045
JNEP-JA 2012	cogito-2.1:671b	79.2892	1.65781
JNEP-JA 2012	qwen3-coder:480b	76.7157	0.925225
JNEP-JA 2012	qwen3-coder-next	74.1422	0.849045
JNEP-JA 2012	deepseek-v3.1:671b	73.5294	2.57353
JNEP-JA 2012	nemotron-3-super	71.8137	2.60831
JNEP-JA 2012	ministral-3:14b	70.8333	0.925225
JNEP-JA 2012	devstral-small-2:24b	67.5245	0.765318
JNEP-JA 2012	ministral-3:8b	63.3578	0.56159
JNEP-JA 2012	gemma3:27b	62.6225	0.424522
JNEP-JA 2012	gemma3:12b	53.9216	0.56159
JNEP-JA 2012	ministral-3:3b	39.8284	0.56159
JNEP-JA 2012	nemotron-3-nano:30b	39.0931	1.65781
JNEP-JA 2012	gemma3:4b	34.1912	0.367647
JNEP-JA 2012	rnj-1:8b	21.9363	1.18182
JNEP-JA 2013	gemini-3-flash-preview	98.294	0.227303
JNEP-JA 2013	glm-5	92.3885	0.454607
JNEP-JA 2013	glm-4.7	91.3386	0.787402
JNEP-JA 2013	qwen3.5:397b	90.1575	0.68191
JNEP-JA 2013	glm-4.6	89.2388	0.227303
JNEP-JA 2013	kimi-k2-thinking	88.4514	0.990792
JNEP-JA 2013	deepseek-v3.2	87.9265	1.13652
JNEP-JA 2013	mistral-large-3:675b	87.664	0.601388
JNEP-JA 2013	qwen3-vl:235b	86.2205	0.787402
JNEP-JA 2013	kimi-k2.5	85.0394	2.58167
JNEP-JA 2013	qwen3-next:80b	84.9081	0.227303
JNEP-JA 2013	minimax-m2.5	84.5144	1.49053
JNEP-JA 2013	minimax-m2	83.0709	0.787402
JNEP-JA 2013	minimax-m2.1	82.9396	1.20278
JNEP-JA 2013	qwen3-vl:235b-instruct	82.5459	0.227303
JNEP-JA 2013	devstral-2:123b	81.7585	0.227303
JNEP-JA 2013	gpt-oss:120b	80.9711	1.20278
JNEP-JA 2013	cogito-2.1:671b	79.6588	0.601388
JNEP-JA 2013	kimi-k2:1t	77.4278	1.20278
JNEP-JA 2013	qwen3-coder-next	75.1969	0.393701
JNEP-JA 2013	gpt-oss:20b	73.8845	1.63911
JNEP-JA 2013	deepseek-v3.1:671b	73.4908	1.13652
JNEP-JA 2013	devstral-small-2:24b	72.9659	0.601388
JNEP-JA 2013	nemotron-3-super	71.3911	1.20278
JNEP-JA 2013	qwen3-coder:480b	70.8661	1.1811
JNEP-JA 2013	ministral-3:14b	70.8661	0.393701
JNEP-JA 2013	gemma3:27b	65.2231	0.601388
JNEP-JA 2013	ministral-3:8b	61.0236	0.68191
JNEP-JA 2013	gemma3:12b	52.8871	0.990792
JNEP-JA 2013	ministral-3:3b	39.1076	0.819554
JNEP-JA 2013	nemotron-3-nano:30b	37.1391	2.53114
JNEP-JA 2013	gemma3:4b	32.1522	0.227303
JNEP-JA 2013	rnj-1:8b	22.1785	0.909213
JNEP-JA 2014	gemini-3-flash-preview	96.5471	0.829349
JNEP-JA 2014	glm-5	92.5631	1.21715
JNEP-JA 2014	glm-4.7	92.4303	0.398406
JNEP-JA 2014	qwen3.5:397b	92.0319	0.398406
JNEP-JA 2014	deepseek-v3.2	91.3679	0.829349
JNEP-JA 2014	kimi-k2-thinking	91.2351	0.796813
JNEP-JA 2014	qwen3-vl:235b	90.8367	0.69006
JNEP-JA 2014	glm-4.6	90.0398	0.796813
JNEP-JA 2014	minimax-m2.5	88.9774	0.92008
JNEP-JA 2014	qwen3-next:80b	87.6494	0.398406
JNEP-JA 2014	mistral-large-3:675b	87.251	0
JNEP-JA 2014	kimi-k2.5	86.9854	0.92008
JNEP-JA 2014	minimax-m2.1	86.8526	0.398406
JNEP-JA 2014	minimax-m2	85.923	1.50834
JNEP-JA 2014	gpt-oss:120b	85.6574	1.73661
JNEP-JA 2014	qwen3-vl:235b-instruct	83.1341	0.23002
JNEP-JA 2014	kimi-k2:1t	80.3453	1.21715
JNEP-JA 2014	devstral-2:123b	80.3453	0.23002
JNEP-JA 2014	gpt-oss:20b	78.0876	1.05408
JNEP-JA 2014	cogito-2.1:671b	75.9628	0.608576
JNEP-JA 2014	qwen3-coder-next	74.1036	1.43647
JNEP-JA 2014	deepseek-v3.1:671b	73.9708	1.39916
JNEP-JA 2014	qwen3-coder:480b	70.3851	1.39916
JNEP-JA 2014	nemotron-3-super	66.5339	0.69006
JNEP-JA 2014	ministral-3:14b	64.5418	0.69006
JNEP-JA 2014	devstral-small-2:24b	60.5578	0.398406
JNEP-JA 2014	ministral-3:8b	58.5657	1.05408
JNEP-JA 2014	gemma3:27b	55.6441	0.23002
JNEP-JA 2014	gemma3:12b	44.4887	1.1501
JNEP-JA 2014	ministral-3:3b	40.1062	1.21715
JNEP-JA 2014	nemotron-3-nano:30b	36.919	2.99026
JNEP-JA 2014	gemma3:4b	27.7556	0.46004
JNEP-JA 2014	rnj-1:8b	22.7092	1.43647
JNEP-JA 2015	gemini-3-flash-preview	95.8512	0.65559
JNEP-JA 2015	glm-4.7	91.8455	1.28755
JNEP-JA 2015	glm-5	91.1302	1.50725
JNEP-JA 2015	qwen3.5:397b	90.701	0.49558
JNEP-JA 2015	kimi-k2-thinking	89.6996	1.13552
JNEP-JA 2015	deepseek-v3.2	89.2704	0.743369
JNEP-JA 2015	glm-4.6	88.9843	1.08009
JNEP-JA 2015	qwen3-vl:235b	87.4106	1.08009
JNEP-JA 2015	minimax-m2.5	86.6953	0.858369
JNEP-JA 2015	minimax-m2.1	86.5522	1.37964
JNEP-JA 2015	qwen3-next:80b	86.5522	0.24779
JNEP-JA 2015	kimi-k2.5	86.123	0.65559
JNEP-JA 2015	gpt-oss:120b	83.834	1.37964
JNEP-JA 2015	minimax-m2	83.834	1.37964
JNEP-JA 2015	mistral-large-3:675b	80.9728	0.24779
JNEP-JA 2015	kimi-k2:1t	78.8269	0.893419
JNEP-JA 2015	qwen3-vl:235b-instruct	78.5408	0.429185
JNEP-JA 2015	devstral-2:123b	76.3948	0
JNEP-JA 2015	cogito-2.1:671b	75.3934	0.893419
JNEP-JA 2015	gpt-oss:20b	74.2489	1.87077
JNEP-JA 2015	deepseek-v3.1:671b	71.2446	0.429185
JNEP-JA 2015	qwen3-coder-next	69.5279	0.743369
JNEP-JA 2015	nemotron-3-super	68.9557	1.9353
JNEP-JA 2015	ministral-3:14b	68.5265	0.65559
JNEP-JA 2015	qwen3-coder:480b	67.0959	0.49558
JNEP-JA 2015	devstral-small-2:24b	61.6595	0.991159
JNEP-JA 2015	ministral-3:8b	59.2275	0.429185
JNEP-JA 2015	gemma3:27b	55.6509	0.49558
JNEP-JA 2015	gemma3:12b	49.4993	0.65559
JNEP-JA 2015	ministral-3:3b	38.6266	0.429185
JNEP-JA 2015	nemotron-3-nano:30b	37.3391	1.28755
JNEP-JA 2015	gemma3:4b	26.0372	0.991159
JNEP-JA 2015	rnj-1:8b	23.176	1.28755
JNEP-JA 2016	gemini-3-flash-preview	96.6245	0.421941
JNEP-JA 2016	qwen3.5:397b	94.0928	0.730823
JNEP-JA 2016	glm-5	92.5457	1.21804
JNEP-JA 2016	deepseek-v3.2	91.2799	2.08139
JNEP-JA 2016	glm-4.7	90.9986	1.06186
JNEP-JA 2016	qwen3-vl:235b	90.9986	0.243608
JNEP-JA 2016	glm-4.6	90.5767	0.974431
JNEP-JA 2016	qwen3-next:80b	90.436	0.644525
JNEP-JA 2016	kimi-k2-thinking	90.2954	0.421941
JNEP-JA 2016	mistral-large-3:675b	89.0295	0.421941
JNEP-JA 2016	minimax-m2.5	88.1857	0.421941
JNEP-JA 2016	kimi-k2.5	86.4979	1.11635
JNEP-JA 2016	minimax-m2.1	86.2166	0.644525
JNEP-JA 2016	minimax-m2	85.0914	2.08139
JNEP-JA 2016	devstral-2:123b	84.9508	0.644525
JNEP-JA 2016	gpt-oss:120b	84.6695	1.48181
JNEP-JA 2016	qwen3-vl:235b-instruct	83.9662	0.421941
JNEP-JA 2016	gpt-oss:20b	79.7468	1.11635
JNEP-JA 2016	kimi-k2:1t	78.7623	0.87834
JNEP-JA 2016	cogito-2.1:671b	78.1997	2.08139
JNEP-JA 2016	deepseek-v3.1:671b	76.9339	0.644525
JNEP-JA 2016	qwen3-coder:480b	75.1055	0.730823
JNEP-JA 2016	qwen3-coder-next	73.1364	0.243608
JNEP-JA 2016	ministral-3:14b	72.2925	0.243608
JNEP-JA 2016	nemotron-3-super	70.4641	0.421941
JNEP-JA 2016	devstral-small-2:24b	70.1828	1.28905
JNEP-JA 2016	gemma3:27b	62.7286	0.644525
JNEP-JA 2016	ministral-3:8b	61.8847	0.644525
JNEP-JA 2016	gemma3:12b	55.9775	0.487215
JNEP-JA 2016	ministral-3:3b	43.4599	0.730823
JNEP-JA 2016	nemotron-3-nano:30b	38.8186	1.8392
JNEP-JA 2016	gemma3:4b	30.2391	0.644525
JNEP-JA 2016	rnj-1:8b	23.7693	0.243608
JNEP-JA 2017	gemini-3-flash-preview	95.6522	0.869565
JNEP-JA 2017	glm-4.7	88.8406	0.664141
JNEP-JA 2017	glm-5	88.8406	1.64606
JNEP-JA 2017	qwen3.5:397b	88.1159	0.251022
JNEP-JA 2017	glm-4.6	87.8261	1.73913
JNEP-JA 2017	deepseek-v3.2	87.6812	0.664141
JNEP-JA 2017	minimax-m2.5	85.7971	1.96054
JNEP-JA 2017	qwen3-next:80b	85.0725	0.905072
JNEP-JA 2017	qwen3-vl:235b	85.0725	0.664141
JNEP-JA 2017	kimi-k2-thinking	84.2029	1.32828
JNEP-JA 2017	mistral-large-3:675b	83.6232	0.251022
JNEP-JA 2017	kimi-k2.5	83.3333	0.664141
JNEP-JA 2017	minimax-m2.1	82.8986	2.14473
JNEP-JA 2017	minimax-m2	81.7391	1.56763
JNEP-JA 2017	devstral-2:123b	78.9855	0.664141
JNEP-JA 2017	gpt-oss:120b	78.8406	1.75715
JNEP-JA 2017	qwen3-vl:235b-instruct	78.8406	0.664141
JNEP-JA 2017	gpt-oss:20b	73.7681	0.502044
JNEP-JA 2017	kimi-k2:1t	73.0435	0
JNEP-JA 2017	cogito-2.1:671b	72.8986	2.14473
JNEP-JA 2017	qwen3-coder-next	68.4058	0.664141
JNEP-JA 2017	nemotron-3-super	66.9565	1.56763
JNEP-JA 2017	deepseek-v3.1:671b	66.5217	1.89517
JNEP-JA 2017	ministral-3:14b	65.942	0.502044
JNEP-JA 2017	qwen3-coder:480b	65.6522	1.15033
JNEP-JA 2017	devstral-small-2:24b	64.2029	0.905072
JNEP-JA 2017	ministral-3:8b	61.3043	0.753066
JNEP-JA 2017	gemma3:27b	59.7101	1.09418
JNEP-JA 2017	gemma3:12b	53.1884	0.664141
JNEP-JA 2017	nemotron-3-nano:30b	36.2319	3.6463
JNEP-JA 2017	ministral-3:3b	35.0725	0.905072
JNEP-JA 2017	gemma3:4b	24.6377	0.664141
JNEP-JA 2017	rnj-1:8b	24.058	1.52691
JNEP-JA 2018	gemini-3-flash-preview	95.2381	0
JNEP-JA 2018	glm-5	91.9192	1.74955
JNEP-JA 2018	qwen3.5:397b	89.6104	0.749806
JNEP-JA 2018	glm-4.6	89.3218	1.08944
JNEP-JA 2018	glm-4.7	89.0332	1.32253
JNEP-JA 2018	kimi-k2-thinking	88.7446	1.14535
JNEP-JA 2018	qwen3-vl:235b	88.3117	0.4329
JNEP-JA 2018	deepseek-v3.2	88.0231	1.74955
JNEP-JA 2018	minimax-m2.5	88.0231	0.49987
JNEP-JA 2018	qwen3-next:80b	86.4358	0.661266
JNEP-JA 2018	minimax-m2.1	86.1472	1.14535
JNEP-JA 2018	mistral-large-3:675b	86.0029	0.249935
JNEP-JA 2018	minimax-m2	84.7042	0.661266
JNEP-JA 2018	kimi-k2.5	83.6941	0.661266
JNEP-JA 2018	gpt-oss:120b	83.1169	0.865801
JNEP-JA 2018	devstral-2:123b	82.9726	0.49987
JNEP-JA 2018	qwen3-vl:235b-instruct	81.8182	0.4329
JNEP-JA 2018	kimi-k2:1t	79.2208	0
JNEP-JA 2018	cogito-2.1:671b	77.9221	1.14535
JNEP-JA 2018	gpt-oss:20b	76.912	0.901154
JNEP-JA 2018	qwen3-coder:480b	75.3247	1.14535
JNEP-JA 2018	deepseek-v3.1:671b	71.4286	2.29069
JNEP-JA 2018	qwen3-coder-next	71.2843	1.39158
JNEP-JA 2018	ministral-3:14b	68.8312	0
JNEP-JA 2018	devstral-small-2:24b	68.3983	0.4329
JNEP-JA 2018	nemotron-3-super	65.5123	1.95206
JNEP-JA 2018	gemma3:27b	58.2973	0.661266
JNEP-JA 2018	ministral-3:8b	57.4315	0.661266
JNEP-JA 2018	gemma3:12b	52.9582	0.49987
JNEP-JA 2018	ministral-3:3b	39.9711	1.08944
JNEP-JA 2018	nemotron-3-nano:30b	33.0447	1.74955
JNEP-JA 2018	gemma3:4b	28.4271	0.49987
JNEP-JA 2018	rnj-1:8b	23.5209	1.39158
JNEP-JA 2019	gemini-3-flash-preview	95.4829	0.26979
JNEP-JA 2019	qwen3.5:397b	93.1464	1.42759
JNEP-JA 2019	glm-5	92.2118	0.972741
JNEP-JA 2019	deepseek-v3.2	91.2773	0.713797
JNEP-JA 2019	glm-4.7	90.81	1.17599
JNEP-JA 2019	minimax-m2.5	90.3427	0.53958
JNEP-JA 2019	qwen3-next:80b	89.4081	2.35197
JNEP-JA 2019	kimi-k2.5	88.9408	0.713797
JNEP-JA 2019	qwen3-vl:235b	88.162	0.26979
JNEP-JA 2019	kimi-k2-thinking	88.0062	1.17599
JNEP-JA 2019	glm-4.6	87.6947	1.17599
JNEP-JA 2019	minimax-m2.1	86.6044	1.07916
JNEP-JA 2019	minimax-m2	85.9813	0.80937
JNEP-JA 2019	gpt-oss:120b	85.0467	1.68484
JNEP-JA 2019	mistral-large-3:675b	83.0218	0.26979
JNEP-JA 2019	qwen3-vl:235b-instruct	81.4642	0.26979
JNEP-JA 2019	kimi-k2:1t	79.9065	1.61874
JNEP-JA 2019	devstral-2:123b	79.595	0.26979
JNEP-JA 2019	gpt-oss:20b	78.3489	1.42759
JNEP-JA 2019	cogito-2.1:671b	77.8816	0.972741
JNEP-JA 2019	qwen3-coder:480b	75.7009	0.46729
JNEP-JA 2019	deepseek-v3.1:671b	75.5452	1.07916
JNEP-JA 2019	qwen3-coder-next	74.7664	0.934579
JNEP-JA 2019	nemotron-3-super	68.5358	0.713797
JNEP-JA 2019	devstral-small-2:24b	63.3956	0.53958
JNEP-JA 2019	ministral-3:14b	62.7726	0.713797
JNEP-JA 2019	gemma3:27b	60.1246	0.53958
JNEP-JA 2019	ministral-3:8b	53.4268	0.713797
JNEP-JA 2019	gemma3:12b	47.8193	0.26979
JNEP-JA 2019	ministral-3:3b	40.9657	1.42759
JNEP-JA 2019	gemma3:4b	30.2181	0.972741
JNEP-JA 2019	nemotron-3-nano:30b	30.0623	2.15832
JNEP-JA 2019	rnj-1:8b	20.8723	1.17599
JNEP-JA 2020	gemini-3-flash-preview	93.4641	1.02042
JNEP-JA 2020	deepseek-v3.2	87.4183	1.02042
JNEP-JA 2020	glm-5	87.4183	2.46727
JNEP-JA 2020	glm-4.7	86.6013	1.85585
JNEP-JA 2020	qwen3.5:397b	86.1111	0.56603
JNEP-JA 2020	kimi-k2-thinking	85.6209	1.13206
JNEP-JA 2020	qwen3-vl:235b	85.2941	1.29694
JNEP-JA 2020	minimax-m2.5	84.4771	1.57576
JNEP-JA 2020	kimi-k2.5	84.1503	2.21042
JNEP-JA 2020	minimax-m2.1	83.4967	2.41808
JNEP-JA 2020	glm-4.6	83.0065	1.23363
JNEP-JA 2020	qwen3-next:80b	82.8431	0.490196
JNEP-JA 2020	minimax-m2	80.2288	0.283015
JNEP-JA 2020	gpt-oss:120b	79.902	0.980392
JNEP-JA 2020	mistral-large-3:675b	78.268	0.283015
JNEP-JA 2020	qwen3-vl:235b-instruct	76.4706	0
JNEP-JA 2020	gpt-oss:20b	73.6928	1.57576
JNEP-JA 2020	kimi-k2:1t	72.8758	1.02042
JNEP-JA 2020	devstral-2:123b	69.6078	0.490196
JNEP-JA 2020	deepseek-v3.1:671b	68.9542	3.44302
JNEP-JA 2020	qwen3-coder-next	67.9739	0.56603
JNEP-JA 2020	qwen3-coder:480b	67.9739	0.283015
JNEP-JA 2020	cogito-2.1:671b	67.6471	0.849045
JNEP-JA 2020	nemotron-3-super	64.0523	2.51549
JNEP-JA 2020	ministral-3:14b	57.8431	1.29694
JNEP-JA 2020	devstral-small-2:24b	54.4118	0.980392
JNEP-JA 2020	gemma3:12b	53.268	0.56603
JNEP-JA 2020	gemma3:27b	50.3268	0.748787
JNEP-JA 2020	ministral-3:8b	50.3268	0.283015
JNEP-JA 2020	ministral-3:3b	31.8627	0.849045
JNEP-JA 2020	nemotron-3-nano:30b	29.5752	2.26412
JNEP-JA 2020	gemma3:4b	28.5948	0.283015
JNEP-JA 2020	rnj-1:8b	20.098	3.06127
JNEP-JA 2021	gemini-3-flash-preview	94.3925	0.934579
JNEP-JA 2021	glm-5	92.0561	1.86916
JNEP-JA 2021	deepseek-v3.2	90.9657	0.972741
JNEP-JA 2021	glm-4.7	90.9657	1.42759
JNEP-JA 2021	qwen3.5:397b	89.5639	1.34895
JNEP-JA 2021	glm-4.6	89.2523	0.46729
JNEP-JA 2021	kimi-k2-thinking	87.3832	1.23633
JNEP-JA 2021	qwen3-next:80b	87.3832	0.46729
JNEP-JA 2021	minimax-m2.5	87.2274	0.26979
JNEP-JA 2021	minimax-m2.1	86.7601	2.35197
JNEP-JA 2021	qwen3-vl:235b	85.514	1.40187
JNEP-JA 2021	gpt-oss:120b	83.9564	1.50213
JNEP-JA 2021	mistral-large-3:675b	83.6449	0.46729
JNEP-JA 2021	kimi-k2.5	83.3333	1.42759
JNEP-JA 2021	qwen3-vl:235b-instruct	82.0872	0.53958
JNEP-JA 2021	minimax-m2	81.1526	1.17599
JNEP-JA 2021	kimi-k2:1t	80.8411	1.23633
JNEP-JA 2021	devstral-2:123b	80.5296	0.53958
JNEP-JA 2021	cogito-2.1:671b	78.8162	1.17599
JNEP-JA 2021	gpt-oss:20b	74.6106	0.972741
JNEP-JA 2021	qwen3-coder-next	70.8723	1.07916
JNEP-JA 2021	deepseek-v3.1:671b	70.2492	1.50213
JNEP-JA 2021	nemotron-3-super	68.5358	3.11137
JNEP-JA 2021	qwen3-coder:480b	66.9782	0.713797
JNEP-JA 2021	devstral-small-2:24b	66.6667	0.53958
JNEP-JA 2021	ministral-3:14b	65.109	1.07916
JNEP-JA 2021	gemma3:27b	61.215	0.80937
JNEP-JA 2021	ministral-3:8b	58.7227	0.972741
JNEP-JA 2021	gemma3:12b	48.4424	0.26979
JNEP-JA 2021	nemotron-3-nano:30b	36.9159	0.80937
JNEP-JA 2021	ministral-3:3b	34.2679	1.64107
JNEP-JA 2021	gemma3:4b	26.6355	0.46729
JNEP-JA 2021	rnj-1:8b	24.4548	2.65712
JNEP-JA 2022	gemini-3-flash-preview	96.142	0.534584
JNEP-JA 2022	qwen3.5:397b	91.9753	0.267292
JNEP-JA 2022	glm-4.7	91.0494	0.534584
JNEP-JA 2022	glm-5	91.0494	0.963734
JNEP-JA 2022	glm-4.6	89.9691	0.707188
JNEP-JA 2022	kimi-k2-thinking	88.1173	1.48822
JNEP-JA 2022	deepseek-v3.2	87.5	0.801875
JNEP-JA 2022	minimax-m2.5	87.5	0.462963
JNEP-JA 2022	qwen3-vl:235b	87.5	0.462963
JNEP-JA 2022	kimi-k2.5	87.3457	1.75275
JNEP-JA 2022	qwen3-next:80b	86.8827	0.707188
JNEP-JA 2022	qwen3-vl:235b-instruct	84.7222	0
JNEP-JA 2022	minimax-m2.1	84.2593	0.462963
JNEP-JA 2022	minimax-m2	83.4877	1.87104
JNEP-JA 2022	devstral-2:123b	82.8704	0.925926
JNEP-JA 2022	gpt-oss:120b	82.8704	2.01801
JNEP-JA 2022	mistral-large-3:675b	82.0988	0.267292
JNEP-JA 2022	kimi-k2:1t	79.4753	0.963734
JNEP-JA 2022	cogito-2.1:671b	77.7778	1.66924
JNEP-JA 2022	qwen3-coder-next	76.5432	0.963734
JNEP-JA 2022	gpt-oss:20b	76.3889	1.60375
JNEP-JA 2022	deepseek-v3.1:671b	74.3827	2.82875
JNEP-JA 2022	nemotron-3-super	72.3765	0.963734
JNEP-JA 2022	qwen3-coder:480b	72.3765	0.267292
JNEP-JA 2022	ministral-3:14b	67.284	0.534584
JNEP-JA 2022	devstral-small-2:24b	63.2716	0.267292
JNEP-JA 2022	gemma3:27b	62.3457	0.267292
JNEP-JA 2022	ministral-3:8b	61.8827	0.707188
JNEP-JA 2022	gemma3:12b	54.321	0.267292
JNEP-JA 2022	ministral-3:3b	43.0556	0.462963
JNEP-JA 2022	nemotron-3-nano:30b	38.2716	5.07854
JNEP-JA 2022	gemma3:4b	31.0185	0.801875
JNEP-JA 2022	rnj-1:8b	22.0679	2.28374
JNEP-JA 2023	gemini-3-flash-preview	94.7967	0.281634
JNEP-JA 2023	glm-5	90.2439	2.53471
JNEP-JA 2023	qwen3.5:397b	89.5935	1.71311
JNEP-JA 2023	glm-4.6	89.5935	1.49027
JNEP-JA 2023	glm-4.7	89.2683	0.487805
JNEP-JA 2023	qwen3-vl:235b	87.3171	1.46341
JNEP-JA 2023	minimax-m2.5	86.5041	1.71311
JNEP-JA 2023	deepseek-v3.2	86.3415	1.46341
JNEP-JA 2023	kimi-k2-thinking	86.1789	1.40817
JNEP-JA 2023	qwen3-next:80b	85.6911	1.56807
JNEP-JA 2023	minimax-m2.1	84.3902	0
JNEP-JA 2023	qwen3-vl:235b-instruct	84.3902	0
JNEP-JA 2023	gpt-oss:120b	83.0894	1.71311
JNEP-JA 2023	minimax-m2	82.7642	1.22762
JNEP-JA 2023	devstral-2:123b	82.1138	0.281634
JNEP-JA 2023	mistral-large-3:675b	82.1138	0.281634
JNEP-JA 2023	kimi-k2.5	81.9512	1.29061
JNEP-JA 2023	kimi-k2:1t	77.0732	0.844903
JNEP-JA 2023	gpt-oss:20b	75.6098	1.29061
JNEP-JA 2023	cogito-2.1:671b	72.0325	2.19963
JNEP-JA 2023	qwen3-coder-next	70.7317	1.46341
JNEP-JA 2023	nemotron-3-super	69.5935	1.40817
JNEP-JA 2023	ministral-3:14b	69.5935	0.281634
JNEP-JA 2023	qwen3-coder:480b	66.9919	0.745134
JNEP-JA 2023	deepseek-v3.1:671b	66.1789	3.66125
JNEP-JA 2023	devstral-small-2:24b	63.252	0.281634
JNEP-JA 2023	gemma3:27b	61.9512	0.97561
JNEP-JA 2023	ministral-3:8b	61.626	1.01545
JNEP-JA 2023	gemma3:12b	53.1707	0
JNEP-JA 2023	ministral-3:3b	42.9268	0.487805
JNEP-JA 2023	nemotron-3-nano:30b	32.6829	6.56274
JNEP-JA 2023	gemma3:4b	27.8049	0.97561
JNEP-JA 2023	rnj-1:8b	21.3008	1.97144
JNEP-JA 2024	gemini-3-flash-preview	91.129	0.403226
JNEP-JA 2024	glm-4.6	85.4839	0.806452
JNEP-JA 2024	glm-5	85.2151	0.615938
JNEP-JA 2024	deepseek-v3.2	85.0806	1.06684
JNEP-JA 2024	qwen3.5:397b	84.9462	1.98907
JNEP-JA 2024	glm-4.7	84.8118	2.02953
JNEP-JA 2024	kimi-k2-thinking	83.871	1.06684
JNEP-JA 2024	qwen3-vl:235b	81.9892	1.29619
JNEP-JA 2024	minimax-m2.5	81.586	0.615938
JNEP-JA 2024	qwen3-next:80b	80.914	1.01476
JNEP-JA 2024	minimax-m2.1	80.2419	2.41935
JNEP-JA 2024	kimi-k2.5	80.1075	1.86242
JNEP-JA 2024	gpt-oss:120b	79.3011	0.465605
JNEP-JA 2024	minimax-m2	77.8226	1.84781
JNEP-JA 2024	mistral-large-3:675b	77.6882	0.615938
JNEP-JA 2024	qwen3-vl:235b-instruct	73.7903	0.806452
JNEP-JA 2024	devstral-2:123b	70.9677	0.806452
JNEP-JA 2024	gpt-oss:20b	70.4301	1.52659
JNEP-JA 2024	kimi-k2:1t	68.5484	1.75762
JNEP-JA 2024	cogito-2.1:671b	67.4731	1.52659
JNEP-JA 2024	qwen3-coder:480b	65.1882	1.41608
JNEP-JA 2024	nemotron-3-super	63.9785	1.16401
JNEP-JA 2024	qwen3-coder-next	63.8441	2.46375
JNEP-JA 2024	deepseek-v3.1:671b	62.9032	1.84781
JNEP-JA 2024	devstral-small-2:24b	57.2581	0.403226
JNEP-JA 2024	ministral-3:14b	56.8548	0.806452
JNEP-JA 2024	gemma3:27b	52.4194	0.403226
JNEP-JA 2024	ministral-3:8b	47.7151	0.615938
JNEP-JA 2024	gemma3:12b	43.6828	0.615938
JNEP-JA 2024	ministral-3:3b	33.1989	0.839381
JNEP-JA 2024	nemotron-3-nano:30b	32.9301	1.52659
JNEP-JA 2024	gemma3:4b	26.4785	0.615938
JNEP-JA 2024	rnj-1:8b	23.2527	2.83216
JRSE 2019	gemini-3-flash-preview	98.0392	0.485168
JRSE 2019	mistral-large-3:675b	93.5574	0.485168
JRSE 2019	qwen3.5:397b	91.5966	0
JRSE 2019	deepseek-v3.2	90.7563	1.4555
JRSE 2019	glm-4.7	90.1961	1.28363
JRSE 2019	glm-4.6	89.0756	2.22332
JRSE 2019	glm-5	88.2353	2.52101
JRSE 2019	minimax-m2.5	87.6751	3.18146
JRSE 2019	qwen3-vl:235b	86.5546	0.840336
JRSE 2019	devstral-2:123b	86.2745	0.485168
JRSE 2019	kimi-k2-thinking	85.4342	1.7493
JRSE 2019	qwen3-vl:235b-instruct	84.5938	0.485168
JRSE 2019	qwen3-next:80b	82.9132	3.4986
JRSE 2019	kimi-k2:1t	82.6331	0.485168
JRSE 2019	minimax-m2.1	82.3529	1.4555
JRSE 2019	gpt-oss:120b	81.7927	2.1148
JRSE 2019	kimi-k2.5	80.9524	0.485168
JRSE 2019	minimax-m2	79.8319	2.22332
JRSE 2019	qwen3-coder:480b	78.9916	1.68067
JRSE 2019	cogito-2.1:671b	74.2297	1.28363
JRSE 2019	qwen3-coder-next	73.1092	3.66294
JRSE 2019	ministral-3:14b	72.8291	0.485168
JRSE 2019	deepseek-v3.1:671b	69.4678	3.88135
JRSE 2019	gpt-oss:20b	67.507	3.88135
JRSE 2019	gemma3:27b	64.986	1.28363
JRSE 2019	devstral-small-2:24b	63.0252	0.840336
JRSE 2019	nemotron-3-super	61.9048	1.94067
JRSE 2019	ministral-3:8b	59.1036	0.970337
JRSE 2019	gemma3:12b	52.6611	0.485168
JRSE 2019	ministral-3:3b	39.2157	1.94067
JRSE 2019	gemma3:4b	29.1317	1.28363
JRSE 2019	rnj-1:8b	23.2493	0.485168
JRSE 2019	nemotron-3-nano:30b	22.1289	4.2296
JRSE 2020	gemini-3-flash-preview	98.3333	0
JRSE 2020	mistral-large-3:675b	90	0
JRSE 2020	glm-4.7	88.3333	1.44338
JRSE 2020	glm-4.6	88.0556	1.9245
JRSE 2020	qwen3.5:397b	85.8333	0.833333
JRSE 2020	deepseek-v3.2	83.8889	0.481125
JRSE 2020	devstral-2:123b	83.3333	0.833333
JRSE 2020	glm-5	80.5556	1.27294
JRSE 2020	minimax-m2.5	78.8889	3.15495
JRSE 2020	qwen3-vl:235b	78.8889	5.54861
JRSE 2020	qwen3-next:80b	77.7778	1.27294
JRSE 2020	minimax-m2.1	76.6667	1.66667
JRSE 2020	qwen3-vl:235b-instruct	76.1111	0.481125
JRSE 2020	kimi-k2-thinking	75.2778	1.73472
JRSE 2020	gpt-oss:120b	74.1667	2.5
JRSE 2020	kimi-k2.5	73.8889	2.09718
JRSE 2020	minimax-m2	73.3333	0.833333
JRSE 2020	kimi-k2:1t	72.5	2.20479
JRSE 2020	cogito-2.1:671b	72.2222	2.54588
JRSE 2020	qwen3-coder:480b	69.4444	1.27294
JRSE 2020	qwen3-coder-next	67.7778	1.27294
JRSE 2020	ministral-3:14b	67.5	0
JRSE 2020	deepseek-v3.1:671b	67.2222	1.73472
JRSE 2020	gpt-oss:20b	66.6667	0.833333
JRSE 2020	devstral-small-2:24b	60.5556	1.27294
JRSE 2020	gemma3:27b	58.0556	0.481125
JRSE 2020	nemotron-3-super	57.2222	1.9245
JRSE 2020	ministral-3:8b	51.9444	1.27294
JRSE 2020	gemma3:12b	40.5556	0.481125
JRSE 2020	ministral-3:3b	35.2778	0.481125
JRSE 2020	gemma3:4b	32.7778	1.73472
JRSE 2020	rnj-1:8b	24.1667	0.833333
JRSE 2020	nemotron-3-nano:30b	20	3.33333
JRSE 2021	gemini-3-flash-preview	96.3889	0.481125
JRSE 2021	mistral-large-3:675b	86.6667	0.833333
JRSE 2021	glm-4.6	85.5556	0.481125
JRSE 2021	qwen3.5:397b	84.7222	0.481125
JRSE 2021	deepseek-v3.2	84.4444	2.92657
JRSE 2021	glm-4.7	82.7778	3.93818
JRSE 2021	glm-5	80.5556	2.09718
JRSE 2021	minimax-m2.5	80.2778	3.46944
JRSE 2021	qwen3-vl:235b	77.2222	2.92657
JRSE 2021	qwen3-next:80b	76.1111	1.73472
JRSE 2021	qwen3-vl:235b-instruct	76.1111	0.481125
JRSE 2021	devstral-2:123b	75.2778	1.27294
JRSE 2021	kimi-k2-thinking	75.2778	1.73472
JRSE 2021	minimax-m2.1	73.8889	0.96225
JRSE 2021	gpt-oss:120b	72.7778	0.96225
JRSE 2021	kimi-k2:1t	72.2222	1.27294
JRSE 2021	kimi-k2.5	71.6667	3.81881
JRSE 2021	qwen3-coder:480b	70	3.63242
JRSE 2021	minimax-m2	68.0556	2.54588
JRSE 2021	ministral-3:14b	67.7778	0.96225
JRSE 2021	qwen3-coder-next	66.9444	0.481125
JRSE 2021	gpt-oss:20b	65.8333	1.44338
JRSE 2021	cogito-2.1:671b	64.7222	3.15495
JRSE 2021	devstral-small-2:24b	64.1667	0.833333
JRSE 2021	deepseek-v3.1:671b	63.3333	0.833333
JRSE 2021	gemma3:27b	56.6667	0
JRSE 2021	ministral-3:8b	55.2778	2.54588
JRSE 2021	gemma3:12b	45.5556	0.96225
JRSE 2021	nemotron-3-super	45	2.5
JRSE 2021	ministral-3:3b	27.2222	1.27294
JRSE 2021	gemma3:4b	26.9444	1.27294
JRSE 2021	rnj-1:8b	21.9444	0.481125
JRSE 2021	nemotron-3-nano:30b	18.8889	0.96225
JRSE 2022	gemini-3-flash-preview	96.3889	0.481125
JRSE 2022	mistral-large-3:675b	88.8889	0.481125
JRSE 2022	deepseek-v3.2	88.3333	2.20479
JRSE 2022	glm-4.6	86.9444	1.9245
JRSE 2022	glm-4.7	85.2778	2.40563
JRSE 2022	qwen3.5:397b	84.7222	1.73472
JRSE 2022	minimax-m2.5	81.9444	2.09718
JRSE 2022	devstral-2:123b	81.6667	0.833333
JRSE 2022	glm-5	81.6667	3.81881
JRSE 2022	qwen3-next:80b	81.3889	1.27294
JRSE 2022	qwen3-vl:235b	80	2.20479
JRSE 2022	kimi-k2-thinking	79.7222	3.36788
JRSE 2022	qwen3-vl:235b-instruct	78.8889	0.481125
JRSE 2022	kimi-k2.5	75.2778	2.92657
JRSE 2022	kimi-k2:1t	75.2778	1.73472
JRSE 2022	minimax-m2.1	73.3333	2.20479
JRSE 2022	minimax-m2	72.2222	1.27294
JRSE 2022	gpt-oss:120b	70	3.00463
JRSE 2022	qwen3-coder-next	68.6111	3.15495
JRSE 2022	ministral-3:14b	68.0556	0.96225
JRSE 2022	qwen3-coder:480b	67.7778	2.40563
JRSE 2022	cogito-2.1:671b	66.3889	1.73472
JRSE 2022	deepseek-v3.1:671b	63.3333	2.20479
JRSE 2022	gpt-oss:20b	62.5	0.833333
JRSE 2022	devstral-small-2:24b	58.3333	0.833333
JRSE 2022	gemma3:27b	53.8889	0.481125
JRSE 2022	ministral-3:8b	50.2778	0.481125
JRSE 2022	nemotron-3-super	45.2778	1.73472
JRSE 2022	gemma3:12b	40.2778	0.481125
JRSE 2022	ministral-3:3b	28.6111	2.54588
JRSE 2022	gemma3:4b	27.7778	1.27294
JRSE 2022	rnj-1:8b	21.3889	2.67879
JRSE 2022	nemotron-3-nano:30b	16.6667	4.33013
JRSE 2023	gemini-3-flash-preview	95.7983	0.840336
JRSE 2023	mistral-large-3:675b	85.7143	0
JRSE 2023	glm-4.6	83.4734	2.42584
JRSE 2023	qwen3.5:397b	83.4734	0.970337
JRSE 2023	deepseek-v3.2	83.1933	2.91101
JRSE 2023	glm-4.7	80.112	1.94067
JRSE 2023	glm-5	79.5518	2.56727
JRSE 2023	qwen3-vl:235b	78.9916	2.52101
JRSE 2023	minimax-m2.5	77.591	5.06531
JRSE 2023	devstral-2:123b	77.3109	0.840336
JRSE 2023	kimi-k2-thinking	75.9104	3.39618
JRSE 2023	qwen3-next:80b	75.07	3.39618
JRSE 2023	kimi-k2.5	73.6695	2.1148
JRSE 2023	minimax-m2.1	72.2689	5.11157
JRSE 2023	gpt-oss:120b	71.7087	0.485168
JRSE 2023	kimi-k2:1t	70.3081	3.4986
JRSE 2023	minimax-m2	69.4678	0.485168
JRSE 2023	cogito-2.1:671b	66.3866	1.4555
JRSE 2023	qwen3-vl:235b-instruct	66.3866	0
JRSE 2023	qwen3-coder:480b	65.5462	1.68067
JRSE 2023	qwen3-coder-next	60.7843	2.1148
JRSE 2023	ministral-3:14b	59.944	0.970337
JRSE 2023	gpt-oss:20b	59.944	2.95116
JRSE 2023	devstral-small-2:24b	58.8235	0
JRSE 2023	deepseek-v3.1:671b	58.2633	1.7493
JRSE 2023	gemma3:27b	57.423	1.94067
JRSE 2023	nemotron-3-super	54.902	1.28363
JRSE 2023	ministral-3:8b	50.7003	1.28363
JRSE 2023	gemma3:12b	35.8543	0.485168
JRSE 2023	ministral-3:3b	31.9328	0.840336
JRSE 2023	gemma3:4b	18.4874	1.68067
JRSE 2023	nemotron-3-nano:30b	18.4874	2.22332
JRSE 2023	rnj-1:8b	17.0868	0.485168
JRSE 2024	gemini-3-flash-preview	98.3333	0.833333
JRSE 2024	qwen3.5:397b	89.1667	0.833333
JRSE 2024	deepseek-v3.2	88.0556	0.481125
JRSE 2024	mistral-large-3:675b	86.3889	0.481125
JRSE 2024	devstral-2:123b	85	0
JRSE 2024	glm-4.6	85	2.20479
JRSE 2024	qwen3-vl:235b	85	1.66667
JRSE 2024	glm-4.7	84.1667	2.20479
JRSE 2024	glm-5	82.5	3.81881
JRSE 2024	kimi-k2-thinking	79.4444	1.9245
JRSE 2024	qwen3-next:80b	78.3333	1.66667
JRSE 2024	minimax-m2.5	77.7778	3.46944
JRSE 2024	qwen3-vl:235b-instruct	77.7778	0.481125
JRSE 2024	kimi-k2.5	77.2222	3.36788
JRSE 2024	gpt-oss:120b	74.4444	4.19435
JRSE 2024	kimi-k2:1t	73.6111	1.27294
JRSE 2024	minimax-m2.1	71.9444	0.481125
JRSE 2024	minimax-m2	70.2778	1.73472
JRSE 2024	ministral-3:14b	70.2778	0.481125
JRSE 2024	cogito-2.1:671b	69.7222	3.46944
JRSE 2024	deepseek-v3.1:671b	66.3889	2.09718
JRSE 2024	qwen3-coder:480b	66.3889	1.73472
JRSE 2024	gpt-oss:20b	65.8333	2.88675
JRSE 2024	qwen3-coder-next	62.5	0.833333
JRSE 2024	devstral-small-2:24b	55	0.833333
JRSE 2024	gemma3:27b	50.8333	0.833333
JRSE 2024	nemotron-3-super	45.2778	3.15495
JRSE 2024	ministral-3:8b	40.8333	1.44338
JRSE 2024	ministral-3:3b	35	1.66667
JRSE 2024	gemma3:12b	31.6667	1.66667
JRSE 2024	gemma3:4b	24.4444	0.481125
JRSE 2024	rnj-1:8b	20.8333	2.20479
JRSE 2024	nemotron-3-nano:30b	13.8889	0.481125
JRSE 2025	gemini-3-flash-preview	90.8333	0.833333
JRSE 2025	mistral-large-3:675b	83.6111	0.481125
JRSE 2025	glm-4.6	82.7778	3.15495
JRSE 2025	qwen3.5:397b	81.3889	1.27294
JRSE 2025	deepseek-v3.2	80.8333	1.66667
JRSE 2025	qwen3-vl:235b	78.3333	0.833333
JRSE 2025	qwen3-vl:235b-instruct	76.9444	1.27294
JRSE 2025	glm-4.7	76.1111	2.54588
JRSE 2025	glm-5	75.8333	2.5
JRSE 2025	kimi-k2.5	74.7222	3.36788
JRSE 2025	minimax-m2.5	73.6111	2.92657
JRSE 2025	devstral-2:123b	72.2222	0.481125
JRSE 2025	kimi-k2:1t	71.9444	1.27294
JRSE 2025	qwen3-next:80b	71.9444	1.73472
JRSE 2025	kimi-k2-thinking	71.3889	2.54588
JRSE 2025	minimax-m2.1	69.7222	2.40563
JRSE 2025	minimax-m2	68.0556	2.92657
JRSE 2025	gpt-oss:120b	63.6111	1.73472
JRSE 2025	qwen3-coder:480b	63.0556	2.09718
JRSE 2025	qwen3-coder-next	61.6667	0.833333
JRSE 2025	gpt-oss:20b	60.8333	1.44338
JRSE 2025	cogito-2.1:671b	60.5556	3.75771
JRSE 2025	ministral-3:14b	59.4444	1.27294
JRSE 2025	deepseek-v3.1:671b	55	2.5
JRSE 2025	devstral-small-2:24b	53.3333	0.833333
JRSE 2025	gemma3:27b	52.2222	1.27294
JRSE 2025	nemotron-3-super	45.8333	3.81881
JRSE 2025	ministral-3:8b	40.8333	0
JRSE 2025	gemma3:12b	32.5	2.5
JRSE 2025	gemma3:4b	25.2778	0.96225
JRSE 2025	ministral-3:3b	24.7222	1.27294
JRSE 2025	rnj-1:8b	17.7778	0.481125
JRSE 2025	nemotron-3-nano:30b	10.8333	3.63242

## Sheet: Table S3
Table S3. Subject-level performance summary by examination category
Examination	Subject	Mean accuracy (%)	SD (model)
JNEP-EN	Physics	55.132	16.6938
JNEP-EN	Chemistry	33.7006	14.5675
JNEP-EN	Biology	74.0228	13.3827
JNEP-EN	Hygiene	69.4681	14.7868
JNEP-EN	Pharmacology	68.9394	16.0806
JNEP-EN	Pharmacy	62.7487	16.2126
JNEP-EN	Pathology	70.6423	13.1894
JNEP-EN	Law	53.8037	14.3877
JNEP-EN	Practice	53.5434	12.1342
JNEP-JA	Physics	73.0004	23.7058
JNEP-JA	Chemistry	59.068	21.9986
JNEP-JA	Biology	85.3359	18.6175
JNEP-JA	Hygiene	72.2374	20.0815
JNEP-JA	Pharmacology	74.9705	21.6125
JNEP-JA	Pharmacy	70.5324	21.2927
JNEP-JA	Pathology	80.8838	19.2697
JNEP-JA	Law	67.192	14.9485
JNEP-JA	Practice	69.9267	17.6758
JRSE	Drug Basics	77.2583	20.8459
JRSE	Physiology	78.8817	23.4739
JRSE	Drug Actions	64.6212	22.2745
JRSE	Use & Safety	60.0828	17.1991
JRSE	Regulations	53.5426	16.9606

## Sheet: Table S4
Table S4. Subject-level model performance within each examination category
Examination	Subject	Model	Mean accuracy (%)	SD (trial)
JNEP-EN	Physics	gemini-3-flash-preview	76.3441	4.05905
JNEP-EN	Physics	kimi-k2.5	76.3441	2.46375
JNEP-EN	Physics	glm-5	72.5806	1.6129
JNEP-EN	Physics	qwen3.5:397b	72.5806	1.6129
JNEP-EN	Physics	glm-4.7	72.043	2.46375
JNEP-EN	Physics	kimi-k2-thinking	72.043	3.35753
JNEP-EN	Physics	qwen3-next:80b	69.8925	1.86242
JNEP-EN	Physics	minimax-m2.5	69.3548	2.79363
JNEP-EN	Physics	gpt-oss:120b	68.8172	2.46375
JNEP-EN	Physics	glm-4.6	68.2796	0.93121
JNEP-EN	Physics	qwen3-vl:235b	68.2796	0.93121
JNEP-EN	Physics	deepseek-v3.2	66.129	1.6129
JNEP-EN	Physics	minimax-m2	65.5914	1.86242
JNEP-EN	Physics	gpt-oss:20b	65.0538	0.93121
JNEP-EN	Physics	minimax-m2.1	63.4409	3.35753
JNEP-EN	Physics	kimi-k2:1t	62.3656	5.66433
JNEP-EN	Physics	qwen3-vl:235b-instruct	59.6774	0
JNEP-EN	Physics	mistral-large-3:675b	58.0645	0
JNEP-EN	Physics	devstral-2:123b	53.7634	3.35753
JNEP-EN	Physics	qwen3-coder:480b	51.0753	0.93121
JNEP-EN	Physics	deepseek-v3.1:671b	48.9247	2.46375
JNEP-EN	Physics	ministral-3:14b	48.9247	0.93121
JNEP-EN	Physics	cogito-2.1:671b	48.9247	5.18476
JNEP-EN	Physics	qwen3-coder-next	47.8495	0.93121
JNEP-EN	Physics	nemotron-3-super	47.3118	2.46375
JNEP-EN	Physics	devstral-small-2:24b	39.2473	0.93121
JNEP-EN	Physics	gemma3:27b	38.7097	0
JNEP-EN	Physics	ministral-3:8b	38.7097	1.6129
JNEP-EN	Physics	gemma3:12b	32.2581	1.6129
JNEP-EN	Physics	nemotron-3-nano:30b	26.8817	3.35753
JNEP-EN	Physics	ministral-3:3b	24.7312	1.86242
JNEP-EN	Physics	gemma3:4b	22.5806	1.6129
JNEP-EN	Physics	rnj-1:8b	22.5806	3.22581
JNEP-EN	Chemistry	gemini-3-flash-preview	66.6667	5.24864
JNEP-EN	Chemistry	qwen3.5:397b	63.6364	0
JNEP-EN	Chemistry	qwen3-vl:235b	60.6061	13.8866
JNEP-EN	Chemistry	glm-5	57.5758	5.24864
JNEP-EN	Chemistry	minimax-m2.5	51.5152	13.8866
JNEP-EN	Chemistry	deepseek-v3.2	45.4545	9.09091
JNEP-EN	Chemistry	glm-4.7	42.4242	5.24864
JNEP-EN	Chemistry	kimi-k2-thinking	42.4242	10.4973
JNEP-EN	Chemistry	kimi-k2.5	42.4242	5.24864
JNEP-EN	Chemistry	gemma3:12b	39.3939	5.24864
JNEP-EN	Chemistry	qwen3-next:80b	39.3939	5.24864
JNEP-EN	Chemistry	minimax-m2	39.3939	10.4973
JNEP-EN	Chemistry	cogito-2.1:671b	36.3636	15.7459
JNEP-EN	Chemistry	gemma3:27b	36.3636	0
JNEP-EN	Chemistry	glm-4.6	33.3333	13.8866
JNEP-EN	Chemistry	gpt-oss:20b	30.303	5.24864
JNEP-EN	Chemistry	kimi-k2:1t	30.303	5.24864
JNEP-EN	Chemistry	qwen3-coder-next	27.2727	9.09091
JNEP-EN	Chemistry	devstral-small-2:24b	27.2727	0
JNEP-EN	Chemistry	gemma3:4b	27.2727	0
JNEP-EN	Chemistry	ministral-3:3b	27.2727	0
JNEP-EN	Chemistry	mistral-large-3:675b	27.2727	0
JNEP-EN	Chemistry	qwen3-vl:235b-instruct	27.2727	0
JNEP-EN	Chemistry	deepseek-v3.1:671b	24.2424	18.9242
JNEP-EN	Chemistry	gpt-oss:120b	24.2424	5.24864
JNEP-EN	Chemistry	minimax-m2.1	24.2424	13.8866
JNEP-EN	Chemistry	nemotron-3-super	24.2424	5.24864
JNEP-EN	Chemistry	qwen3-coder:480b	21.2121	5.24864
JNEP-EN	Chemistry	devstral-2:123b	18.1818	0
JNEP-EN	Chemistry	ministral-3:14b	18.1818	0
JNEP-EN	Chemistry	ministral-3:8b	15.1515	5.24864
JNEP-EN	Chemistry	nemotron-3-nano:30b	15.1515	5.24864
JNEP-EN	Chemistry	rnj-1:8b	6.06061	5.24864
JNEP-EN	Biology	qwen3.5:397b	87.6812	1.25511
JNEP-EN	Biology	gemini-3-flash-preview	85.5072	1.25511
JNEP-EN	Biology	qwen3-next:80b	85.5072	1.25511
JNEP-EN	Biology	kimi-k2.5	84.7826	2.17391
JNEP-EN	Biology	glm-4.7	84.058	4.52536
JNEP-EN	Biology	glm-5	84.058	1.25511
JNEP-EN	Biology	minimax-m2.1	84.058	3.32071
JNEP-EN	Biology	qwen3-vl:235b	84.058	1.25511
JNEP-EN	Biology	gpt-oss:120b	82.6087	2.17391
JNEP-EN	Biology	minimax-m2.5	82.6087	0
JNEP-EN	Biology	deepseek-v3.2	81.8841	1.25511
JNEP-EN	Biology	minimax-m2	81.8841	1.25511
JNEP-EN	Biology	kimi-k2-thinking	81.1594	3.32071
JNEP-EN	Biology	kimi-k2:1t	80.4348	2.17391
JNEP-EN	Biology	glm-4.6	79.7101	2.51022
JNEP-EN	Biology	devstral-2:123b	78.2609	0
JNEP-EN	Biology	gpt-oss:20b	78.2609	0
JNEP-EN	Biology	mistral-large-3:675b	76.8116	1.25511
JNEP-EN	Biology	qwen3-vl:235b-instruct	76.087	0
JNEP-EN	Biology	qwen3-coder-next	74.6377	2.51022
JNEP-EN	Biology	qwen3-coder:480b	74.6377	1.25511
JNEP-EN	Biology	cogito-2.1:671b	73.913	4.34783
JNEP-EN	Biology	deepseek-v3.1:671b	73.1884	3.32071
JNEP-EN	Biology	nemotron-3-super	73.1884	3.32071
JNEP-EN	Biology	ministral-3:14b	73.1884	1.25511
JNEP-EN	Biology	gemma3:12b	71.7391	0
JNEP-EN	Biology	ministral-3:8b	68.8406	2.51022
JNEP-EN	Biology	devstral-small-2:24b	64.4928	2.51022
JNEP-EN	Biology	gemma3:27b	60.8696	0
JNEP-EN	Biology	ministral-3:3b	55.0725	3.32071
JNEP-EN	Biology	nemotron-3-nano:30b	50	7.53066
JNEP-EN	Biology	gemma3:4b	36.2319	1.25511
JNEP-EN	Biology	rnj-1:8b	33.3333	1.25511
JNEP-EN	Hygiene	gemini-3-flash-preview	90.625	2.06699
JNEP-EN	Hygiene	qwen3.5:397b	87.5	1.5625
JNEP-EN	Hygiene	glm-5	86.4583	1.6263
JNEP-EN	Hygiene	glm-4.7	84.1146	0.90211
JNEP-EN	Hygiene	kimi-k2.5	83.0729	1.9661
JNEP-EN	Hygiene	qwen3-vl:235b	82.8125	0.78125
JNEP-EN	Hygiene	glm-4.6	81.7708	1.19338
JNEP-EN	Hygiene	kimi-k2-thinking	81.5104	1.9661
JNEP-EN	Hygiene	deepseek-v3.2	79.9479	1.80422
JNEP-EN	Hygiene	minimax-m2.5	79.6875	2.70633
JNEP-EN	Hygiene	minimax-m2	78.9062	0.78125
JNEP-EN	Hygiene	qwen3-next:80b	78.6458	0.90211
JNEP-EN	Hygiene	gpt-oss:120b	78.3854	0.451055
JNEP-EN	Hygiene	minimax-m2.1	77.3438	1.5625
JNEP-EN	Hygiene	qwen3-vl:235b-instruct	76.3021	0.451055
JNEP-EN	Hygiene	kimi-k2:1t	73.4375	1.5625
JNEP-EN	Hygiene	mistral-large-3:675b	71.6146	0.451055
JNEP-EN	Hygiene	gpt-oss:20b	71.0938	2.70633
JNEP-EN	Hygiene	devstral-2:123b	69.5312	0
JNEP-EN	Hygiene	cogito-2.1:671b	66.9271	1.9661
JNEP-EN	Hygiene	qwen3-coder-next	66.6667	1.9661
JNEP-EN	Hygiene	qwen3-coder:480b	66.6667	2.25527
JNEP-EN	Hygiene	nemotron-3-super	65.625	0.78125
JNEP-EN	Hygiene	ministral-3:14b	63.2812	0
JNEP-EN	Hygiene	gemma3:27b	62.5	1.35316
JNEP-EN	Hygiene	devstral-small-2:24b	61.7188	1.5625
JNEP-EN	Hygiene	deepseek-v3.1:671b	59.8958	2.74366
JNEP-EN	Hygiene	ministral-3:8b	53.9062	0.78125
JNEP-EN	Hygiene	gemma3:12b	53.125	1.5625
JNEP-EN	Hygiene	ministral-3:3b	49.4792	2.74366
JNEP-EN	Hygiene	nemotron-3-nano:30b	39.5833	0.90211
JNEP-EN	Hygiene	gemma3:4b	39.0625	0.78125
JNEP-EN	Hygiene	rnj-1:8b	31.25	3.125
JNEP-EN	Pharmacology	gemini-3-flash-preview	87.1951	1.21951
JNEP-EN	Pharmacology	glm-5	84.7561	1.05613
JNEP-EN	Pharmacology	kimi-k2.5	84.3496	0.704086
JNEP-EN	Pharmacology	glm-4.7	83.9431	2.53862
JNEP-EN	Pharmacology	qwen3.5:397b	83.3333	0.704086
JNEP-EN	Pharmacology	glm-4.6	82.9268	1.61326
JNEP-EN	Pharmacology	kimi-k2-thinking	81.0976	1.61326
JNEP-EN	Pharmacology	deepseek-v3.2	80.8943	0.352043
JNEP-EN	Pharmacology	qwen3-vl:235b	80.8943	1.53452
JNEP-EN	Pharmacology	qwen3-next:80b	80.2846	0.352043
JNEP-EN	Pharmacology	minimax-m2.1	79.6748	0.931418
JNEP-EN	Pharmacology	minimax-m2	78.252	1.53452
JNEP-EN	Pharmacology	minimax-m2.5	78.252	1.40817
JNEP-EN	Pharmacology	gpt-oss:120b	78.0488	0.609756
JNEP-EN	Pharmacology	kimi-k2:1t	77.2358	0.352043
JNEP-EN	Pharmacology	gpt-oss:20b	74.3902	1.61326
JNEP-EN	Pharmacology	qwen3-vl:235b-instruct	74.3902	0
JNEP-EN	Pharmacology	mistral-large-3:675b	72.561	0.609756
JNEP-EN	Pharmacology	devstral-2:123b	69.1057	0.352043
JNEP-EN	Pharmacology	cogito-2.1:671b	68.4959	0.931418
JNEP-EN	Pharmacology	deepseek-v3.1:671b	67.8862	0.352043
JNEP-EN	Pharmacology	qwen3-coder-next	67.0732	1.21951
JNEP-EN	Pharmacology	nemotron-3-super	65.4472	1.53452
JNEP-EN	Pharmacology	qwen3-coder:480b	64.4309	0.931418
JNEP-EN	Pharmacology	devstral-small-2:24b	63.6179	0.352043
JNEP-EN	Pharmacology	ministral-3:14b	61.5854	0.609756
JNEP-EN	Pharmacology	gemma3:27b	58.9431	0.931418
JNEP-EN	Pharmacology	ministral-3:8b	56.7073	0.609756
JNEP-EN	Pharmacology	ministral-3:3b	47.9675	0.352043
JNEP-EN	Pharmacology	nemotron-3-nano:30b	46.1382	1.86284
JNEP-EN	Pharmacology	gemma3:12b	44.9187	0.931418
JNEP-EN	Pharmacology	gemma3:4b	25.813	0.704086
JNEP-EN	Pharmacology	rnj-1:8b	24.3902	1.21951
JNEP-EN	Pharmacy	gemini-3-flash-preview	86.8687	1.0101
JNEP-EN	Pharmacy	glm-5	80.4714	1.16636
JNEP-EN	Pharmacy	kimi-k2.5	80.1347	1.16636
JNEP-EN	Pharmacy	glm-4.7	78.1145	1.54295
JNEP-EN	Pharmacy	qwen3.5:397b	76.431	1.54295
JNEP-EN	Pharmacy	glm-4.6	75.7576	3.64197
JNEP-EN	Pharmacy	kimi-k2-thinking	75.4209	2.10269
JNEP-EN	Pharmacy	deepseek-v3.2	74.7475	3.0303
JNEP-EN	Pharmacy	qwen3-vl:235b	74.7475	1.74955
JNEP-EN	Pharmacy	minimax-m2.5	73.7374	2.0202
JNEP-EN	Pharmacy	mistral-large-3:675b	73.064	0.583182
JNEP-EN	Pharmacy	qwen3-next:80b	71.7172	2.0202
JNEP-EN	Pharmacy	minimax-m2	70.7071	2.67248
JNEP-EN	Pharmacy	kimi-k2:1t	70.3704	2.10269
JNEP-EN	Pharmacy	minimax-m2.1	70.3704	3.08591
JNEP-EN	Pharmacy	gpt-oss:120b	69.697	3.0303
JNEP-EN	Pharmacy	cogito-2.1:671b	68.3502	2.33273
JNEP-EN	Pharmacy	qwen3-vl:235b-instruct	67.0034	0.583182
JNEP-EN	Pharmacy	devstral-2:123b	65.9933	0.583182
JNEP-EN	Pharmacy	gpt-oss:20b	62.963	3.24702
JNEP-EN	Pharmacy	qwen3-coder:480b	62.2896	2.54203
JNEP-EN	Pharmacy	deepseek-v3.1:671b	61.9529	5.5632
JNEP-EN	Pharmacy	qwen3-coder-next	60.2694	3.82418
JNEP-EN	Pharmacy	ministral-3:14b	55.8923	1.54295
JNEP-EN	Pharmacy	nemotron-3-super	54.5455	4.40293
JNEP-EN	Pharmacy	devstral-small-2:24b	51.8519	2.10269
JNEP-EN	Pharmacy	gemma3:27b	44.1077	1.54295
JNEP-EN	Pharmacy	ministral-3:3b	43.771	0.583182
JNEP-EN	Pharmacy	ministral-3:8b	43.4343	1.0101
JNEP-EN	Pharmacy	gemma3:12b	41.0774	0.583182
JNEP-EN	Pharmacy	nemotron-3-nano:30b	40.404	6.06061
JNEP-EN	Pharmacy	rnj-1:8b	23.2323	3.49909
JNEP-EN	Pharmacy	gemma3:4b	21.2121	1.0101
JNEP-EN	Pathology	deepseek-v3.2	85.0427	0.740193
JNEP-EN	Pathology	gemini-3-flash-preview	84.4017	1.3344
JNEP-EN	Pathology	glm-5	83.547	0.979183
JNEP-EN	Pathology	glm-4.7	83.1197	0.740193
JNEP-EN	Pathology	kimi-k2.5	82.906	0.979183
JNEP-EN	Pathology	glm-4.6	82.265	0.979183
JNEP-EN	Pathology	gpt-oss:120b	81.1966	1.3344
JNEP-EN	Pathology	qwen3-next:80b	80.9829	0.979183
JNEP-EN	Pathology	kimi-k2-thinking	80.7692	1.28205
JNEP-EN	Pathology	minimax-m2.5	80.5556	0.979183
JNEP-EN	Pathology	qwen3-vl:235b	80.3419	2.25121
JNEP-EN	Pathology	minimax-m2.1	80.1282	1.69599
JNEP-EN	Pathology	minimax-m2	79.9145	2.59067
JNEP-EN	Pathology	qwen3.5:397b	79.2735	5.60057
JNEP-EN	Pathology	gpt-oss:20b	76.7094	0.370096
JNEP-EN	Pathology	qwen3-vl:235b-instruct	76.2821	0
JNEP-EN	Pathology	kimi-k2:1t	75.2137	0.740193
JNEP-EN	Pathology	qwen3-coder-next	71.1538	2.31125
JNEP-EN	Pathology	devstral-2:123b	70.9402	0.740193
JNEP-EN	Pathology	qwen3-coder:480b	70.0855	0.370096
JNEP-EN	Pathology	mistral-large-3:675b	69.0171	0.370096
JNEP-EN	Pathology	ministral-3:14b	67.5214	0.979183
JNEP-EN	Pathology	deepseek-v3.1:671b	67.3077	2.93755
JNEP-EN	Pathology	cogito-2.1:671b	66.8803	0.370096
JNEP-EN	Pathology	nemotron-3-super	66.453	1.85048
JNEP-EN	Pathology	gemma3:27b	60.4701	0.370096
JNEP-EN	Pathology	devstral-small-2:24b	59.6154	0
JNEP-EN	Pathology	gemma3:12b	58.7607	0.370096
JNEP-EN	Pathology	ministral-3:8b	55.9829	1.3344
JNEP-EN	Pathology	nemotron-3-nano:30b	49.5726	3.28949
JNEP-EN	Pathology	ministral-3:3b	49.359	1.69599
JNEP-EN	Pathology	gemma3:4b	39.5299	0.370096
JNEP-EN	Pathology	rnj-1:8b	35.8974	2.93755
JNEP-EN	Law	gemini-3-flash-preview	88.2812	2.06699
JNEP-EN	Law	kimi-k2.5	71.0938	4.13399
JNEP-EN	Law	glm-5	70.3125	3.90625
JNEP-EN	Law	qwen3.5:397b	70.3125	2.06699
JNEP-EN	Law	glm-4.7	69.0104	0.451055
JNEP-EN	Law	deepseek-v3.2	67.7083	1.80422
JNEP-EN	Law	qwen3-vl:235b	66.6667	1.19338
JNEP-EN	Law	kimi-k2-thinking	65.3646	2.74366
JNEP-EN	Law	glm-4.6	64.8438	2.06699
JNEP-EN	Law	minimax-m2.5	64.5833	1.19338
JNEP-EN	Law	qwen3-next:80b	61.4583	1.9661
JNEP-EN	Law	kimi-k2:1t	59.6354	1.80422
JNEP-EN	Law	minimax-m2.1	59.375	1.35316
JNEP-EN	Law	gpt-oss:120b	58.8542	2.38676
JNEP-EN	Law	qwen3-vl:235b-instruct	58.3333	1.19338
JNEP-EN	Law	devstral-2:123b	55.7292	0.451055
JNEP-EN	Law	minimax-m2	54.9479	1.19338
JNEP-EN	Law	mistral-large-3:675b	54.9479	0.451055
JNEP-EN	Law	gpt-oss:20b	52.3438	2.06699
JNEP-EN	Law	qwen3-coder-next	50.2604	1.6263
JNEP-EN	Law	cogito-2.1:671b	49.7396	4.30279
JNEP-EN	Law	deepseek-v3.1:671b	48.4375	0.78125
JNEP-EN	Law	devstral-small-2:24b	47.3958	0.90211
JNEP-EN	Law	qwen3-coder:480b	45.0521	0.90211
JNEP-EN	Law	ministral-3:14b	44.7917	1.19338
JNEP-EN	Law	nemotron-3-super	43.4896	3.15738
JNEP-EN	Law	ministral-3:8b	42.1875	0.78125
JNEP-EN	Law	gemma3:27b	36.4583	0.451055
JNEP-EN	Law	ministral-3:3b	31.7708	1.19338
JNEP-EN	Law	gemma3:12b	31.25	0.78125
JNEP-EN	Law	gemma3:4b	30.7292	0.451055
JNEP-EN	Law	rnj-1:8b	30.4688	4.8789
JNEP-EN	Law	nemotron-3-nano:30b	29.6875	9.00981
JNEP-EN	Practice	gemini-3-flash-preview	73.7052	1.05408
JNEP-EN	Practice	qwen3.5:397b	70.7835	2.19425
JNEP-EN	Practice	kimi-k2.5	69.1899	2.00527
JNEP-EN	Practice	glm-5	68.9243	0.398406
JNEP-EN	Practice	deepseek-v3.2	65.2058	0.23002
JNEP-EN	Practice	kimi-k2-thinking	64.5418	1.73661
JNEP-EN	Practice	glm-4.7	64.409	2.04446
JNEP-EN	Practice	qwen3-next:80b	63.745	1.19522
JNEP-EN	Practice	qwen3-vl:235b	63.3466	2.42341
JNEP-EN	Practice	minimax-m2.5	62.8154	0.92008
JNEP-EN	Practice	glm-4.6	62.1514	1.59363
JNEP-EN	Practice	qwen3-vl:235b-instruct	60.2922	0.23002
JNEP-EN	Practice	minimax-m2.1	59.761	4.69714
JNEP-EN	Practice	minimax-m2	59.4954	0.23002
JNEP-EN	Practice	gpt-oss:120b	59.3625	1.05408
JNEP-EN	Practice	kimi-k2:1t	56.3081	0.92008
JNEP-EN	Practice	gpt-oss:20b	54.9801	0
JNEP-EN	Practice	mistral-large-3:675b	51.66	0.23002
JNEP-EN	Practice	cogito-2.1:671b	51.5272	1.50834
JNEP-EN	Practice	qwen3-coder:480b	50.5976	0
JNEP-EN	Practice	devstral-2:123b	50.0664	1.21715
JNEP-EN	Practice	qwen3-coder-next	49.5352	0.92008
JNEP-EN	Practice	deepseek-v3.1:671b	47.4104	1.73661
JNEP-EN	Practice	nemotron-3-super	45.8167	3.16225
JNEP-EN	Practice	devstral-small-2:24b	44.8871	0.46004
JNEP-EN	Practice	ministral-3:14b	44.6215	1.05408
JNEP-EN	Practice	ministral-3:8b	40.1062	0.829349
JNEP-EN	Practice	gemma3:12b	40.1062	0.608576
JNEP-EN	Practice	ministral-3:3b	39.9734	1.79651
JNEP-EN	Practice	gemma3:27b	39.8406	0
JNEP-EN	Practice	nemotron-3-nano:30b	33.7317	1.00263
JNEP-EN	Practice	gemma3:4b	30.2789	0.69006
JNEP-EN	Practice	rnj-1:8b	27.7556	0.608576
JNEP-JA	Physics	gemini-3-flash-preview	98.7421	0.628931
JNEP-JA	Physics	kimi-k2-thinking	98.1132	0.628931
JNEP-JA	Physics	glm-5	96.8553	1.08934
JNEP-JA	Physics	qwen3-vl:235b	95.8071	0.726227
JNEP-JA	Physics	qwen3.5:397b	95.5975	1.08934
JNEP-JA	Physics	glm-4.7	95.1782	0.960708
JNEP-JA	Physics	glm-4.6	94.3396	1.08934
JNEP-JA	Physics	deepseek-v3.2	94.13	0.960708
JNEP-JA	Physics	minimax-m2.5	93.9203	0.726227
JNEP-JA	Physics	kimi-k2.5	93.7107	1.25786
JNEP-JA	Physics	minimax-m2.1	93.501	0.363113
JNEP-JA	Physics	qwen3-next:80b	93.0818	1.25786
JNEP-JA	Physics	gpt-oss:120b	91.4046	2.54179
JNEP-JA	Physics	minimax-m2	89.3082	0.628931
JNEP-JA	Physics	gpt-oss:20b	84.2767	0.628931
JNEP-JA	Physics	qwen3-vl:235b-instruct	79.8742	0.628931
JNEP-JA	Physics	mistral-large-3:675b	78.4067	0.363113
JNEP-JA	Physics	devstral-2:123b	75.2621	0.363113
JNEP-JA	Physics	kimi-k2:1t	74.2138	1.25786
JNEP-JA	Physics	cogito-2.1:671b	67.5052	1.58277
JNEP-JA	Physics	qwen3-coder:480b	66.0377	0.628931
JNEP-JA	Physics	qwen3-coder-next	64.9895	1.30922
JNEP-JA	Physics	deepseek-v3.1:671b	62.4738	1.30922
JNEP-JA	Physics	nemotron-3-super	61.6352	1.66399
JNEP-JA	Physics	ministral-3:14b	57.8616	0
JNEP-JA	Physics	devstral-small-2:24b	54.5073	0.363113
JNEP-JA	Physics	gemma3:27b	53.0398	0.363113
JNEP-JA	Physics	ministral-3:8b	49.6855	1.25786
JNEP-JA	Physics	gemma3:12b	45.7023	1.30922
JNEP-JA	Physics	ministral-3:3b	36.2683	1.30922
JNEP-JA	Physics	nemotron-3-nano:30b	33.543	1.92142
JNEP-JA	Physics	gemma3:4b	23.8994	1.25786
JNEP-JA	Physics	rnj-1:8b	16.1426	0.363113
JNEP-JA	Chemistry	gemini-3-flash-preview	87.8788	1.31216
JNEP-JA	Chemistry	qwen3.5:397b	87.8788	2.62432
JNEP-JA	Chemistry	deepseek-v3.2	84.0909	2.27273
JNEP-JA	Chemistry	glm-5	84.0909	2.27273
JNEP-JA	Chemistry	kimi-k2.5	84.0909	2.27273
JNEP-JA	Chemistry	qwen3-next:80b	81.8182	4.54545
JNEP-JA	Chemistry	glm-4.6	80.303	2.62432
JNEP-JA	Chemistry	glm-4.7	80.303	1.31216
JNEP-JA	Chemistry	kimi-k2-thinking	76.5152	4.73106
JNEP-JA	Chemistry	qwen3-vl:235b	75.7576	1.31216
JNEP-JA	Chemistry	minimax-m2.1	74.2424	5.71957
JNEP-JA	Chemistry	minimax-m2	72.7273	3.93648
JNEP-JA	Chemistry	minimax-m2.5	72.7273	4.54545
JNEP-JA	Chemistry	mistral-large-3:675b	68.1818	0
JNEP-JA	Chemistry	kimi-k2:1t	65.1515	1.31216
JNEP-JA	Chemistry	gpt-oss:120b	64.3939	3.47165
JNEP-JA	Chemistry	qwen3-vl:235b-instruct	63.6364	0
JNEP-JA	Chemistry	devstral-2:123b	60.6061	1.31216
JNEP-JA	Chemistry	deepseek-v3.1:671b	59.0909	2.27273
JNEP-JA	Chemistry	cogito-2.1:671b	58.3333	4.73106
JNEP-JA	Chemistry	gpt-oss:20b	56.0606	11.4391
JNEP-JA	Chemistry	qwen3-coder:480b	47.7273	3.93648
JNEP-JA	Chemistry	nemotron-3-super	46.2121	1.31216
JNEP-JA	Chemistry	gemma3:27b	45.4545	2.27273
JNEP-JA	Chemistry	qwen3-coder-next	43.9394	3.47165
JNEP-JA	Chemistry	devstral-small-2:24b	43.1818	3.93648
JNEP-JA	Chemistry	ministral-3:14b	40.9091	2.27273
JNEP-JA	Chemistry	gemma3:12b	39.3939	1.31216
JNEP-JA	Chemistry	ministral-3:8b	32.5758	3.47165
JNEP-JA	Chemistry	ministral-3:3b	21.2121	1.31216
JNEP-JA	Chemistry	nemotron-3-nano:30b	19.697	2.62432
JNEP-JA	Chemistry	rnj-1:8b	17.4242	10.2483
JNEP-JA	Chemistry	gemma3:4b	13.6364	0
JNEP-JA	Biology	gemini-3-flash-preview	98.8345	1.0682
JNEP-JA	Biology	glm-5	98.1352	0.403741
JNEP-JA	Biology	qwen3.5:397b	97.669	0.403741
JNEP-JA	Biology	glm-4.7	97.2028	0.699301
JNEP-JA	Biology	kimi-k2-thinking	97.2028	0.699301
JNEP-JA	Biology	minimax-m2.5	97.2028	0.699301
JNEP-JA	Biology	minimax-m2.1	97.2028	0
JNEP-JA	Biology	qwen3-next:80b	97.2028	0
JNEP-JA	Biology	qwen3-vl:235b	97.2028	0
JNEP-JA	Biology	glm-4.6	96.9697	1.0682
JNEP-JA	Biology	minimax-m2	96.2704	1.0682
JNEP-JA	Biology	gpt-oss:120b	95.8042	1.3986
JNEP-JA	Biology	qwen3-vl:235b-instruct	95.8042	0
JNEP-JA	Biology	deepseek-v3.2	95.338	0.807483
JNEP-JA	Biology	gpt-oss:20b	93.7063	0.699301
JNEP-JA	Biology	mistral-large-3:675b	93.007	0
JNEP-JA	Biology	kimi-k2.5	93.007	1.85018
JNEP-JA	Biology	qwen3-coder:480b	92.5408	0.403741
JNEP-JA	Biology	devstral-2:123b	91.6084	0
JNEP-JA	Biology	cogito-2.1:671b	91.3753	1.61497
JNEP-JA	Biology	kimi-k2:1t	91.1422	1.0682
JNEP-JA	Biology	qwen3-coder-next	88.1119	0.699301
JNEP-JA	Biology	nemotron-3-super	87.4126	2.0979
JNEP-JA	Biology	deepseek-v3.1:671b	86.4802	1.45571
JNEP-JA	Biology	ministral-3:14b	82.5175	0
JNEP-JA	Biology	devstral-small-2:24b	80.6527	0.403741
JNEP-JA	Biology	ministral-3:8b	75.9907	0.403741
JNEP-JA	Biology	gemma3:12b	73.4266	0.699301
JNEP-JA	Biology	gemma3:27b	72.4942	1.0682
JNEP-JA	Biology	ministral-3:3b	52.2145	0.403741
JNEP-JA	Biology	nemotron-3-nano:30b	52.2145	2.82619
JNEP-JA	Biology	gemma3:4b	36.5967	0.403741
JNEP-JA	Biology	rnj-1:8b	23.5431	2.45586
JNEP-JA	Hygiene	gemini-3-flash-preview	97.366	0.786581
JNEP-JA	Hygiene	glm-5	93.733	1.18771
JNEP-JA	Hygiene	qwen3.5:397b	92.0981	0.544959
JNEP-JA	Hygiene	deepseek-v3.2	91.9164	1.7518
JNEP-JA	Hygiene	glm-4.7	91.2807	0.720913
JNEP-JA	Hygiene	glm-4.6	90.1907	0.982439
JNEP-JA	Hygiene	qwen3-vl:235b	88.5559	0.817439
JNEP-JA	Hygiene	minimax-m2.5	87.5568	0.786581
JNEP-JA	Hygiene	kimi-k2-thinking	86.376	0.943897
JNEP-JA	Hygiene	qwen3-next:80b	85.7402	0.157316
JNEP-JA	Hygiene	kimi-k2.5	85.4678	0.685725
JNEP-JA	Hygiene	mistral-large-3:675b	83.8329	0.157316
JNEP-JA	Hygiene	minimax-m2.1	83.1971	1.64243
JNEP-JA	Hygiene	minimax-m2	82.0163	2.37542
JNEP-JA	Hygiene	gpt-oss:120b	81.4714	1.78677
JNEP-JA	Hygiene	devstral-2:123b	80.2906	0.416219
JNEP-JA	Hygiene	qwen3-vl:235b-instruct	79.2916	0
JNEP-JA	Hygiene	cogito-2.1:671b	76.9301	1.85473
JNEP-JA	Hygiene	gpt-oss:20b	74.4777	1.5007
JNEP-JA	Hygiene	kimi-k2:1t	72.8429	1.13442
JNEP-JA	Hygiene	deepseek-v3.1:671b	70.3906	1.25853
JNEP-JA	Hygiene	qwen3-coder-next	70.0272	1.18771
JNEP-JA	Hygiene	nemotron-3-super	66.485	0.817439
JNEP-JA	Hygiene	ministral-3:14b	65.9401	1.65743
JNEP-JA	Hygiene	qwen3-coder:480b	65.5767	0.314632
JNEP-JA	Hygiene	devstral-small-2:24b	61.762	0.567211
JNEP-JA	Hygiene	gemma3:27b	58.0381	0.471948
JNEP-JA	Hygiene	ministral-3:8b	56.4033	0.27248
JNEP-JA	Hygiene	gemma3:12b	44.5958	0.416219
JNEP-JA	Hygiene	ministral-3:3b	35.8765	0.685725
JNEP-JA	Hygiene	nemotron-3-nano:30b	33.7875	2.83169
JNEP-JA	Hygiene	gemma3:4b	28.6104	0.27248
JNEP-JA	Hygiene	rnj-1:8b	21.7075	2.79651
JNEP-JA	Pharmacology	gemini-3-flash-preview	94.702	0
JNEP-JA	Pharmacology	glm-4.7	92.936	0.441501
JNEP-JA	Pharmacology	glm-5	91.6115	0.220751
JNEP-JA	Pharmacology	qwen3.5:397b	91.3171	0.509802
JNEP-JA	Pharmacology	glm-4.6	91.17	0.662252
JNEP-JA	Pharmacology	qwen3-next:80b	90.8021	0.254901
JNEP-JA	Pharmacology	deepseek-v3.2	90.6549	0.337202
JNEP-JA	Pharmacology	minimax-m2.5	90.4341	0.555543
JNEP-JA	Pharmacology	qwen3-vl:235b	90.287	0.883002
JNEP-JA	Pharmacology	kimi-k2-thinking	89.9926	0.337202
JNEP-JA	Pharmacology	gpt-oss:120b	89.6983	0.337202
JNEP-JA	Pharmacology	minimax-m2.1	88.9625	0.441501
JNEP-JA	Pharmacology	minimax-m2	87.7851	0.77525
JNEP-JA	Pharmacology	kimi-k2.5	87.3436	0.919058
JNEP-JA	Pharmacology	mistral-large-3:675b	86.9021	0.12745
JNEP-JA	Pharmacology	qwen3-vl:235b-instruct	84.5475	0.220751
JNEP-JA	Pharmacology	devstral-2:123b	83.738	0.12745
JNEP-JA	Pharmacology	gpt-oss:20b	82.0456	0.555543
JNEP-JA	Pharmacology	kimi-k2:1t	81.457	0.584051
JNEP-JA	Pharmacology	cogito-2.1:671b	80.4268	0.709614
JNEP-JA	Pharmacology	qwen3-coder-next	76.6004	0.441501
JNEP-JA	Pharmacology	deepseek-v3.1:671b	76.0854	0.637252
JNEP-JA	Pharmacology	qwen3-coder:480b	75.0552	0.662252
JNEP-JA	Pharmacology	nemotron-3-super	72.7741	0.674404
JNEP-JA	Pharmacology	ministral-3:14b	65.5629	1.34277
JNEP-JA	Pharmacology	devstral-small-2:24b	64.6063	0.709614
JNEP-JA	Pharmacology	gemma3:27b	61.1479	0
JNEP-JA	Pharmacology	ministral-3:8b	60.9272	0.220751
JNEP-JA	Pharmacology	gemma3:12b	48.6387	0.555543
JNEP-JA	Pharmacology	ministral-3:3b	36.7918	0.12745
JNEP-JA	Pharmacology	nemotron-3-nano:30b	35.2465	2.42156
JNEP-JA	Pharmacology	gemma3:4b	17.3657	0.12745
JNEP-JA	Pharmacology	rnj-1:8b	16.4091	2.23311
JNEP-JA	Pharmacy	gemini-3-flash-preview	95.7733	1.19981
JNEP-JA	Pharmacy	glm-5	93.3718	0.49915
JNEP-JA	Pharmacy	qwen3.5:397b	91.3545	0.576369
JNEP-JA	Pharmacy	glm-4.7	90.682	0.725248
JNEP-JA	Pharmacy	kimi-k2-thinking	89.5293	0.880418
JNEP-JA	Pharmacy	kimi-k2.5	88.3766	1.83022
JNEP-JA	Pharmacy	qwen3-vl:235b	88.3766	0.725248
JNEP-JA	Pharmacy	glm-4.6	88.2805	0.599904
JNEP-JA	Pharmacy	deepseek-v3.2	87.9923	1.36191
JNEP-JA	Pharmacy	minimax-m2.5	87.3199	0
JNEP-JA	Pharmacy	minimax-m2.1	86.1671	1.15274
JNEP-JA	Pharmacy	qwen3-next:80b	84.8223	0.440209
JNEP-JA	Pharmacy	minimax-m2	83.7656	1.19981
JNEP-JA	Pharmacy	gpt-oss:120b	82.805	1.33107
JNEP-JA	Pharmacy	mistral-large-3:675b	82.7089	0.288184
JNEP-JA	Pharmacy	qwen3-vl:235b-instruct	76.8492	0.332767
JNEP-JA	Pharmacy	kimi-k2:1t	73.1988	0.864553
JNEP-JA	Pharmacy	devstral-2:123b	72.8146	0.166383
JNEP-JA	Pharmacy	gpt-oss:20b	72.5264	1.09105
JNEP-JA	Pharmacy	cogito-2.1:671b	72.3343	1.32063
JNEP-JA	Pharmacy	qwen3-coder:480b	67.8194	0.599904
JNEP-JA	Pharmacy	deepseek-v3.1:671b	66.7627	0.831917
JNEP-JA	Pharmacy	qwen3-coder-next	66.2824	1.52493
JNEP-JA	Pharmacy	nemotron-3-super	64.7454	2.16298
JNEP-JA	Pharmacy	ministral-3:14b	60.2305	0.288184
JNEP-JA	Pharmacy	devstral-small-2:24b	60.0384	0.166383
JNEP-JA	Pharmacy	ministral-3:8b	52.2574	0.440209
JNEP-JA	Pharmacy	gemma3:27b	51.0086	0.288184
JNEP-JA	Pharmacy	gemma3:12b	43.9001	0.440209
JNEP-JA	Pharmacy	ministral-3:3b	32.4688	1.16468
JNEP-JA	Pharmacy	nemotron-3-nano:30b	30.3554	0.725248
JNEP-JA	Pharmacy	gemma3:4b	23.439	0.599904
JNEP-JA	Pharmacy	rnj-1:8b	19.2123	1.36191
JNEP-JA	Pathology	gemini-3-flash-preview	97.5758	0.131216
JNEP-JA	Pathology	glm-4.7	96.2121	0.262432
JNEP-JA	Pathology	glm-5	95.7576	0.73058
JNEP-JA	Pathology	qwen3.5:397b	94.8485	1.02483
JNEP-JA	Pathology	deepseek-v3.2	94.4697	0.131216
JNEP-JA	Pathology	kimi-k2-thinking	94.3939	0.473106
JNEP-JA	Pathology	glm-4.6	94.2424	0.131216
JNEP-JA	Pathology	qwen3-vl:235b	94.0909	0.393648
JNEP-JA	Pathology	minimax-m2.5	94.0152	0.347165
JNEP-JA	Pathology	qwen3-next:80b	93.3333	0.473106
JNEP-JA	Pathology	minimax-m2.1	92.6515	0.131216
JNEP-JA	Pathology	minimax-m2	92.4242	0.473106
JNEP-JA	Pathology	qwen3-vl:235b-instruct	91.3636	0.227273
JNEP-JA	Pathology	mistral-large-3:675b	91.2121	0.131216
JNEP-JA	Pathology	gpt-oss:120b	90.7576	0.918512
JNEP-JA	Pathology	kimi-k2.5	89.4697	0.131216
JNEP-JA	Pathology	devstral-2:123b	88.7879	0.131216
JNEP-JA	Pathology	cogito-2.1:671b	87.7273	0.819443
JNEP-JA	Pathology	kimi-k2:1t	87.4242	0.524864
JNEP-JA	Pathology	gpt-oss:20b	85.303	0.347165
JNEP-JA	Pathology	qwen3-coder-next	83.8636	0.454545
JNEP-JA	Pathology	qwen3-coder:480b	83.4848	0.571957
JNEP-JA	Pathology	deepseek-v3.1:671b	82.803	2.38727
JNEP-JA	Pathology	nemotron-3-super	79.3182	1.04149
JNEP-JA	Pathology	ministral-3:14b	76.3636	0.454545
JNEP-JA	Pathology	devstral-small-2:24b	74.3939	0.262432
JNEP-JA	Pathology	ministral-3:8b	69.9242	0.262432
JNEP-JA	Pathology	gemma3:27b	68.4091	0.227273
JNEP-JA	Pathology	gemma3:12b	60.1515	0.347165
JNEP-JA	Pathology	nemotron-3-nano:30b	43.7879	0.73058
JNEP-JA	Pathology	ministral-3:3b	43.5606	0.131216
JNEP-JA	Pathology	gemma3:4b	32.5	0.454545
JNEP-JA	Pathology	rnj-1:8b	24.5455	1.13636
JNEP-JA	Law	gemini-3-flash-preview	96.4559	0.59818
JNEP-JA	Law	deepseek-v3.2	81.3218	1.14943
JNEP-JA	Law	qwen3.5:397b	81.3218	0.760273
JNEP-JA	Law	glm-5	81.2261	0.438944
JNEP-JA	Law	glm-4.7	80.8429	0.59818
JNEP-JA	Law	mistral-large-3:675b	80.7471	0.760273
JNEP-JA	Law	glm-4.6	80.364	2.01832
JNEP-JA	Law	devstral-2:123b	77.8736	0.574713
JNEP-JA	Law	kimi-k2.5	76.1494	1.52055
JNEP-JA	Law	kimi-k2-thinking	75.8621	2.01149
JNEP-JA	Law	minimax-m2.5	75.4789	1.7321
JNEP-JA	Law	qwen3-vl:235b	74.8084	0.877888
JNEP-JA	Law	qwen3-next:80b	73.9464	0.829526
JNEP-JA	Law	qwen3-vl:235b-instruct	73.5632	0.574713
JNEP-JA	Law	kimi-k2:1t	71.1686	0.877888
JNEP-JA	Law	cogito-2.1:671b	69.8276	1.03608
JNEP-JA	Law	minimax-m2.1	69.8276	2.55408
JNEP-JA	Law	minimax-m2	69.4444	3.07261
JNEP-JA	Law	gpt-oss:120b	68.1992	0.829526
JNEP-JA	Law	deepseek-v3.1:671b	67.8161	1.79454
JNEP-JA	Law	qwen3-coder-next	66.4751	0.923721
JNEP-JA	Law	ministral-3:14b	65.0383	0.723164
JNEP-JA	Law	devstral-small-2:24b	62.8352	0.723164
JNEP-JA	Law	nemotron-3-super	62.3563	0.497716
JNEP-JA	Law	qwen3-coder:480b	61.59	0.33181
JNEP-JA	Law	gpt-oss:20b	61.3027	2.17583
JNEP-JA	Law	ministral-3:8b	59.9617	0.165905
JNEP-JA	Law	gemma3:27b	57.9502	0.438944
JNEP-JA	Law	gemma3:12b	51.8199	0.438944
JNEP-JA	Law	ministral-3:3b	43.5824	0.829526
JNEP-JA	Law	gemma3:4b	36.0153	0.33181
JNEP-JA	Law	nemotron-3-nano:30b	33.4291	1.58264
JNEP-JA	Law	rnj-1:8b	28.7356	0.760273
JNEP-JA	Practice	gemini-3-flash-preview	92.7495	0.355454
JNEP-JA	Practice	glm-5	87.3352	0.407733
JNEP-JA	Practice	qwen3.5:397b	87.1469	0.141243
JNEP-JA	Practice	glm-4.7	86.4407	0.882062
JNEP-JA	Practice	deepseek-v3.2	85.6874	0.431504
JNEP-JA	Practice	kimi-k2-thinking	85.5461	0.163093
JNEP-JA	Practice	glm-4.6	85.2166	0.534737
JNEP-JA	Practice	qwen3-next:80b	83.8983	0.615664
JNEP-JA	Practice	qwen3-vl:235b	83.71	0.294021
JNEP-JA	Practice	minimax-m2.1	82.7213	1.31237
JNEP-JA	Practice	minimax-m2.5	82.4859	1.2232
JNEP-JA	Practice	kimi-k2.5	80.2731	1.23402
JNEP-JA	Practice	mistral-large-3:675b	79.8023	0.141243
JNEP-JA	Practice	minimax-m2	79.049	0.897013
JNEP-JA	Practice	qwen3-vl:235b-instruct	78.8606	0.0815466
JNEP-JA	Practice	gpt-oss:120b	78.4369	1.54939
JNEP-JA	Practice	kimi-k2:1t	75.6121	0.163093
JNEP-JA	Practice	devstral-2:123b	74.6704	0.163093
JNEP-JA	Practice	gpt-oss:20b	71.1864	1.15612
JNEP-JA	Practice	cogito-2.1:671b	68.2674	1.54939
JNEP-JA	Practice	qwen3-coder-next	66.6667	0.747387
JNEP-JA	Practice	qwen3-coder:480b	66.1017	0.706215
JNEP-JA	Practice	deepseek-v3.1:671b	64.9247	0.667488
JNEP-JA	Practice	ministral-3:14b	64.7834	0.588041
JNEP-JA	Practice	nemotron-3-super	63.6535	0.777905
JNEP-JA	Practice	devstral-small-2:24b	62.0998	0.431504
JNEP-JA	Practice	gemma3:27b	56.8267	0.326187
JNEP-JA	Practice	ministral-3:8b	52.4011	1.01852
JNEP-JA	Practice	gemma3:12b	50.6121	0.431504
JNEP-JA	Practice	ministral-3:3b	37.806	0.6369
JNEP-JA	Practice	gemma3:4b	33.7571	0.141243
JNEP-JA	Practice	nemotron-3-nano:30b	32.8154	1.04112
JNEP-JA	Practice	rnj-1:8b	26.0358	1.60628
JRSE	Drug Basics	gemini-3-flash-preview	97.8571	0
JRSE	Drug Basics	mistral-large-3:675b	95.7143	0
JRSE	Drug Basics	qwen3.5:397b	94.2857	0.714286
JRSE	Drug Basics	glm-4.6	94.0476	0.412393
JRSE	Drug Basics	glm-5	93.5714	0.714286
JRSE	Drug Basics	deepseek-v3.2	93.0952	2.70424
JRSE	Drug Basics	glm-4.7	93.0952	1.4869
JRSE	Drug Basics	kimi-k2-thinking	90.7143	1.23718
JRSE	Drug Basics	qwen3-vl:235b	90.2381	0.412393
JRSE	Drug Basics	devstral-2:123b	90	0
JRSE	Drug Basics	minimax-m2.5	90	0.714286
JRSE	Drug Basics	qwen3-next:80b	89.7619	1.4869
JRSE	Drug Basics	qwen3-vl:235b-instruct	87.1429	0.714286
JRSE	Drug Basics	cogito-2.1:671b	85	0.714286
JRSE	Drug Basics	minimax-m2	85	0.714286
JRSE	Drug Basics	kimi-k2:1t	84.2857	1.23718
JRSE	Drug Basics	minimax-m2.1	84.2857	0.714286
JRSE	Drug Basics	kimi-k2.5	82.8571	2.14286
JRSE	Drug Basics	ministral-3:14b	81.9048	0.412393
JRSE	Drug Basics	gpt-oss:120b	80.2381	1.4869
JRSE	Drug Basics	qwen3-coder-next	80	0.714286
JRSE	Drug Basics	qwen3-coder:480b	79.7619	1.09109
JRSE	Drug Basics	deepseek-v3.1:671b	78.5714	1.88982
JRSE	Drug Basics	devstral-small-2:24b	76.1905	0.412393
JRSE	Drug Basics	gemma3:27b	75	0
JRSE	Drug Basics	gpt-oss:20b	74.5238	3.22089
JRSE	Drug Basics	ministral-3:8b	71.9048	1.09109
JRSE	Drug Basics	nemotron-3-super	64.2857	1.23718
JRSE	Drug Basics	gemma3:12b	50.9524	0.412393
JRSE	Drug Basics	ministral-3:3b	40.4762	1.79758
JRSE	Drug Basics	gemma3:4b	32.8571	1.42857
JRSE	Drug Basics	rnj-1:8b	23.0952	1.79758
JRSE	Drug Basics	nemotron-3-nano:30b	18.8095	3.22089
JRSE	Physiology	gemini-3-flash-preview	99.2857	0
JRSE	Physiology	deepseek-v3.2	97.8571	0
JRSE	Physiology	qwen3.5:397b	97.8571	0.714286
JRSE	Physiology	minimax-m2.5	95.9524	1.09109
JRSE	Physiology	mistral-large-3:675b	95.7143	0
JRSE	Physiology	glm-4.6	95.4762	0.824786
JRSE	Physiology	glm-4.7	95	1.88982
JRSE	Physiology	kimi-k2-thinking	94.5238	1.09109
JRSE	Physiology	minimax-m2.1	94.5238	0.824786
JRSE	Physiology	glm-5	94.2857	0.714286
JRSE	Physiology	gpt-oss:120b	93.8095	1.4869
JRSE	Physiology	devstral-2:123b	93.3333	0.412393
JRSE	Physiology	qwen3-vl:235b	93.0952	0.412393
JRSE	Physiology	minimax-m2	92.619	1.64957
JRSE	Physiology	qwen3-next:80b	92.381	0.412393
JRSE	Physiology	qwen3-vl:235b-instruct	91.4286	0
JRSE	Physiology	kimi-k2:1t	90.4762	1.09109
JRSE	Physiology	gpt-oss:20b	88.3333	1.4869
JRSE	Physiology	qwen3-coder:480b	87.381	0.824786
JRSE	Physiology	kimi-k2.5	85.7143	3.27327
JRSE	Physiology	ministral-3:14b	82.8571	0.714286
JRSE	Physiology	cogito-2.1:671b	80.4762	2.29611
JRSE	Physiology	qwen3-coder-next	79.5238	2.70424
JRSE	Physiology	deepseek-v3.1:671b	73.3333	2.50849
JRSE	Physiology	devstral-small-2:24b	68.3333	0.412393
JRSE	Physiology	ministral-3:8b	68.3333	0.412393
JRSE	Physiology	gemma3:27b	65.9524	0.824786
JRSE	Physiology	nemotron-3-super	65.4762	0.412393
JRSE	Physiology	gemma3:12b	49.2857	1.23718
JRSE	Physiology	ministral-3:3b	31.9048	0.412393
JRSE	Physiology	gemma3:4b	27.381	1.09109
JRSE	Physiology	rnj-1:8b	22.381	2.88675
JRSE	Physiology	nemotron-3-nano:30b	18.8095	3.37558
JRSE	Drug Actions	gemini-3-flash-preview	95.9524	0.412393
JRSE	Drug Actions	deepseek-v3.2	89.1667	0.743452
JRSE	Drug Actions	qwen3.5:397b	88.4524	1.03098
JRSE	Drug Actions	glm-4.6	87.8571	0.944911
JRSE	Drug Actions	mistral-large-3:675b	86.7857	0
JRSE	Drug Actions	glm-4.7	85.9524	2.53379
JRSE	Drug Actions	glm-5	84.0476	0.545545
JRSE	Drug Actions	qwen3-vl:235b	83.0952	0.824786
JRSE	Drug Actions	minimax-m2.5	82.0238	1.61045
JRSE	Drug Actions	kimi-k2-thinking	79.1667	1.03098
JRSE	Drug Actions	qwen3-next:80b	79.0476	1.35212
JRSE	Drug Actions	kimi-k2.5	78.0952	2.70424
JRSE	Drug Actions	devstral-2:123b	77.8571	0.357143
JRSE	Drug Actions	qwen3-vl:235b-instruct	76.3095	0.412393
JRSE	Drug Actions	minimax-m2.1	75.2381	0.206197
JRSE	Drug Actions	gpt-oss:120b	71.7857	2.17242
JRSE	Drug Actions	minimax-m2	70.2381	2.70424
JRSE	Drug Actions	kimi-k2:1t	69.1667	0.545545
JRSE	Drug Actions	qwen3-coder-next	63.6905	1.35212
JRSE	Drug Actions	qwen3-coder:480b	63.5714	1.2877
JRSE	Drug Actions	cogito-2.1:671b	63.2143	0.944911
JRSE	Drug Actions	ministral-3:14b	61.4286	0.357143
JRSE	Drug Actions	gpt-oss:20b	59.1667	1.61045
JRSE	Drug Actions	deepseek-v3.1:671b	57.619	1.44338
JRSE	Drug Actions	devstral-small-2:24b	52.5	0.357143
JRSE	Drug Actions	gemma3:27b	47.5	0.714286
JRSE	Drug Actions	nemotron-3-super	45.8333	2.0308
JRSE	Drug Actions	ministral-3:8b	38.8095	0.824786
JRSE	Drug Actions	gemma3:12b	33.8095	0.545545
JRSE	Drug Actions	ministral-3:3b	27.7381	0.545545
JRSE	Drug Actions	gemma3:4b	22.2619	0.412393
JRSE	Drug Actions	rnj-1:8b	18.5714	3.97697
JRSE	Drug Actions	nemotron-3-nano:30b	16.5476	1.09109
JRSE	Use & Safety	gemini-3-flash-preview	94.4844	0.41536
JRSE	Use & Safety	qwen3.5:397b	78.8969	3.24406
JRSE	Use & Safety	mistral-large-3:675b	78.1775	0.41536
JRSE	Use & Safety	glm-4.6	77.9376	0.83072
JRSE	Use & Safety	glm-4.7	77.2182	5.10403
JRSE	Use & Safety	deepseek-v3.2	75.5396	1.90342
JRSE	Use & Safety	devstral-2:123b	71.7026	0.83072
JRSE	Use & Safety	minimax-m2.5	71.4628	1.66144
JRSE	Use & Safety	qwen3-vl:235b	70.7434	2.31263
JRSE	Use & Safety	glm-5	69.0647	3.1359
JRSE	Use & Safety	kimi-k2.5	68.8249	2.19788
JRSE	Use & Safety	kimi-k2:1t	68.5851	2.90752
JRSE	Use & Safety	qwen3-vl:235b-instruct	67.3861	0.83072
JRSE	Use & Safety	qwen3-next:80b	67.1463	1.81051
JRSE	Use & Safety	kimi-k2-thinking	66.6667	4.79016
JRSE	Use & Safety	gpt-oss:120b	64.2686	1.81051
JRSE	Use & Safety	minimax-m2.1	63.0695	1.4976
JRSE	Use & Safety	cogito-2.1:671b	62.5899	0.719424
JRSE	Use & Safety	qwen3-coder:480b	61.6307	2.52654
JRSE	Use & Safety	deepseek-v3.1:671b	60.1918	4.21544
JRSE	Use & Safety	ministral-3:14b	58.9928	0.719424
JRSE	Use & Safety	minimax-m2	57.7938	2.0768
JRSE	Use & Safety	qwen3-coder-next	56.8345	2.8777
JRSE	Use & Safety	gpt-oss:20b	56.1151	3.73824
JRSE	Use & Safety	gemma3:27b	52.518	0
JRSE	Use & Safety	devstral-small-2:24b	52.2782	0.41536
JRSE	Use & Safety	nemotron-3-super	48.4412	0.83072
JRSE	Use & Safety	ministral-3:8b	43.1655	0.719424
JRSE	Use & Safety	gemma3:12b	39.3285	0.41536
JRSE	Use & Safety	ministral-3:3b	34.2926	2.31263
JRSE	Use & Safety	gemma3:4b	27.3381	1.24608
JRSE	Use & Safety	rnj-1:8b	22.3022	2.59392
JRSE	Use & Safety	nemotron-3-nano:30b	17.7458	4.79016
JRSE	Regulations	gemini-3-flash-preview	94.2446	0
JRSE	Regulations	mistral-large-3:675b	83.693	1.09894
JRSE	Regulations	glm-4.6	71.7026	2.9952
JRSE	Regulations	devstral-2:123b	70.024	0.41536
JRSE	Regulations	deepseek-v3.2	68.8249	3.96228
JRSE	Regulations	qwen3.5:397b	66.9065	0
JRSE	Regulations	glm-4.7	65.7074	0.83072
JRSE	Regulations	qwen3-vl:235b	63.789	2.31263
JRSE	Regulations	kimi-k2:1t	62.5899	1.90342
JRSE	Regulations	glm-5	62.3501	2.7237
JRSE	Regulations	qwen3-vl:235b-instruct	61.3909	0.41536
JRSE	Regulations	kimi-k2.5	58.2734	0
JRSE	Regulations	qwen3-next:80b	58.2734	3.73824
JRSE	Regulations	minimax-m2.5	56.3549	2.9952
JRSE	Regulations	qwen3-coder:480b	56.3549	2.52654
JRSE	Regulations	kimi-k2-thinking	54.4365	0.83072
JRSE	Regulations	gpt-oss:120b	53.717	4.89702
JRSE	Regulations	minimax-m2	53.4772	3.39987
JRSE	Regulations	minimax-m2.1	53.2374	2.15827
JRSE	Regulations	ministral-3:14b	52.518	0
JRSE	Regulations	deepseek-v3.1:671b	52.2782	1.09894
JRSE	Regulations	devstral-small-2:24b	52.2782	1.09894
JRSE	Regulations	cogito-2.1:671b	51.7986	3.1359
JRSE	Regulations	qwen3-coder-next	51.5588	1.09894
JRSE	Regulations	gemma3:27b	49.1607	1.09894
JRSE	Regulations	gpt-oss:20b	47.482	4.4928
JRSE	Regulations	ministral-3:8b	37.8897	1.09894
JRSE	Regulations	nemotron-3-super	34.5324	2.49216
JRSE	Regulations	gemma3:12b	31.8945	0.83072
JRSE	Regulations	ministral-3:3b	28.0576	1.24608
JRSE	Regulations	gemma3:4b	26.3789	2.19788
JRSE	Regulations	rnj-1:8b	20.6235	6.03345
JRSE	Regulations	nemotron-3-nano:30b	15.1079	2.59392
